# Supplementary material for: Stannyl phosphaketene as a synthon for phosphorus analogues of β-lactams
Source: Royal Society of Chemistry journal article supplement (doi:10.1039/d3cc03117a), 2023-01-01
Supplement: d3cc03117a1.pdf [file d3cc03117a1.pdf]

## Electronic Supplementary Information

### Stannyl phosphaketene as a synthon for phosphorus analogues of $\beta$ -lactams

Yong-an Luo,<sup>‡a</sup> Zhao Zhao,<sup>‡a</sup> Ting Chen,<sup>a</sup> Yanguo Li,<sup>a</sup> Yufen Zhao,<sup>a</sup>  
Douglas W. Stephan,<sup>\*ab</sup> and Yile Wu<sup>\*a</sup>

<sup>a</sup> Institute of Drug Discovery Technology, Ningbo University, Ningbo 315211, Zhejiang, China,  
[wuyile@nbu.edu.cn](mailto:wuyile@nbu.edu.cn)

<sup>b</sup> Department of Chemistry, University of Toronto, Toronto, 80 St. George Street, Ontario M5S 3H6, Canada,  
[dstephan@chem.utoronto.ca](mailto:dstephan@chem.utoronto.ca)

<sup>‡</sup> These authors contributed equally.

# Contents

|                                                                                                                                               |    |
|-----------------------------------------------------------------------------------------------------------------------------------------------|----|
| General Information.....                                                                                                                      | 4  |
| Experimental Section.....                                                                                                                     | 5  |
| Synthesis of <b>1</b> .....                                                                                                                   | 5  |
| Synthesis of <b>2</b> .....                                                                                                                   | 6  |
| Synthesis of <b>3</b> .....                                                                                                                   | 7  |
| Synthesis of <b>4</b> .....                                                                                                                   | 8  |
| Synthesis of <b>5</b> .....                                                                                                                   | 9  |
| Synthesis of <b>6</b> .....                                                                                                                   | 10 |
| Synthesis of <b>7</b> .....                                                                                                                   | 12 |
| X-ray Crystallography.....                                                                                                                    | 13 |
| <b>Table S1.</b> Crystal data and structure refinement details for compounds <b>1-4</b> .....                                                 | 13 |
| <b>Table S2.</b> Crystal data and structure refinement details for compounds <b>5-7</b> .....                                                 | 14 |
| <b>Figure S1.</b> Thermal ellipsoid plot for <b>1</b> with the anisotropic displacement parameters depicted at the 50% probability level..... | 15 |
| <b>Figure S2.</b> Thermal ellipsoid plot for <b>2</b> with the anisotropic displacement parameters depicted at the 50% probability level..... | 15 |
| <b>Figure S3.</b> Thermal ellipsoid plot for <b>3</b> with the anisotropic displacement parameters depicted at the 50% probability level..... | 16 |
| <b>Figure S4.</b> Thermal ellipsoid plot for <b>4</b> with the anisotropic displacement parameters depicted at the 50% probability level..... | 16 |
| <b>Figure S5.</b> Thermal ellipsoid plot for <b>5</b> with the anisotropic displacement parameters depicted at the 50% probability level..... | 17 |
| <b>Figure S6.</b> Thermal ellipsoid plot for <b>6</b> with the anisotropic displacement parameters depicted at the 50% probability level..... | 17 |
| <b>Figure S7.</b> Thermal ellipsoid plot for <b>7</b> with the anisotropic displacement parameters depicted at the 50% probability level..... | 18 |
| NMR Spectra.....                                                                                                                              | 19 |
| <b>Figure S8.</b> <sup>1</sup> H NMR spectrum of <b>1</b> in C <sub>6</sub> D <sub>6</sub> .....                                              | 19 |
| <b>Figure S9.</b> <sup>13</sup> C NMR spectrum of <b>1</b> in C <sub>6</sub> D <sub>6</sub> .....                                             | 19 |
| <b>Figure S10.</b> <sup>31</sup> P NMR spectrum of <b>1</b> in C <sub>6</sub> D <sub>6</sub> .....                                            | 20 |
| <b>Figure S11.</b> <sup>1</sup> H NMR spectrum of <b>2</b> in CDCl <sub>3</sub> .....                                                         | 20 |
| <b>Figure S12.</b> <sup>13</sup> C NMR spectrum of <b>2</b> in CDCl <sub>3</sub> .....                                                        | 21 |
| <b>Figure S13.</b> <sup>31</sup> P NMR spectrum of <b>2</b> in CDCl <sub>3</sub> .....                                                        | 21 |
| <b>Figure S14.</b> <sup>19</sup> F NMR spectrum of <b>2</b> in CDCl <sub>3</sub> .....                                                        | 22 |
| <b>Figure S15.</b> <sup>11</sup> B NMR spectrum of <b>2</b> in CDCl <sub>3</sub> .....                                                        | 22 |
| <b>Figure S16.</b> <sup>1</sup> H NMR spectrum of <b>3</b> in CD <sub>2</sub> Cl <sub>2</sub> .....                                           | 23 |
| <b>Figure S17.</b> <sup>13</sup> C NMR spectrum of <b>3</b> in CD <sub>2</sub> Cl <sub>2</sub> .....                                          | 23 |
| <b>Figure S18.</b> <sup>31</sup> P NMR spectrum of <b>3</b> in CD <sub>2</sub> Cl <sub>2</sub> .....                                          | 24 |
| <b>Figure S19.</b> <sup>19</sup> F NMR spectrum of <b>3</b> in CD <sub>2</sub> Cl <sub>2</sub> .....                                          | 24 |
| <b>Figure S20.</b> <sup>11</sup> B NMR spectrum of <b>3</b> in CD <sub>2</sub> Cl <sub>2</sub> .....                                          | 25 |
| <b>Figure S21.</b> <sup>1</sup> H NMR spectrum of <b>4</b> in CD <sub>2</sub> Cl <sub>2</sub> .....                                           | 25 |
| <b>Figure S22.</b> <sup>13</sup> C NMR spectrum of <b>4</b> in CD <sub>2</sub> Cl <sub>2</sub> .....                                          | 26 |

|                                                                                                                                                                       |    |
|-----------------------------------------------------------------------------------------------------------------------------------------------------------------------|----|
| <b>Figure S23.</b> $^{31}\text{P}$ NMR spectrum of <b>4</b> in $\text{CD}_2\text{Cl}_2$ .....                                                                         | 26 |
| <b>Figure S24.</b> $^{19}\text{F}$ NMR spectrum of <b>4</b> in $\text{CD}_2\text{Cl}_2$ .....                                                                         | 27 |
| <b>Figure S25.</b> $^{11}\text{B}$ NMR spectrum of <b>4</b> in $\text{CD}_2\text{Cl}_2$ .....                                                                         | 27 |
| <b>Figure S26.</b> $^1\text{H}$ NMR spectrum of <b>5</b> in $\text{C}_6\text{D}_6$ .....                                                                              | 28 |
| <b>Figure S27.</b> $^{13}\text{C}$ NMR spectrum of <b>5</b> in $\text{C}_6\text{D}_6$ .....                                                                           | 28 |
| <b>Figure S28.</b> $^{31}\text{P}$ NMR spectrum of <b>5</b> in $\text{C}_6\text{D}_6$ .....                                                                           | 29 |
| <b>Figure S29.</b> $^{19}\text{F}$ NMR spectrum of <b>5</b> in $\text{C}_6\text{D}_6$ .....                                                                           | 29 |
| <b>Figure S30.</b> $^1\text{H}$ NMR spectrum of <b>6</b> in $\text{CD}_2\text{Cl}_2$ .....                                                                            | 30 |
| <b>Figure S31.</b> $^{13}\text{C}$ NMR spectrum of <b>6</b> in $\text{CD}_2\text{Cl}_2$ .....                                                                         | 30 |
| <b>Figure S32.</b> $^{31}\text{P}$ NMR spectrum of <b>6</b> in $\text{CD}_2\text{Cl}_2$ .....                                                                         | 31 |
| <b>Figure S33.</b> $^{19}\text{F}$ NMR spectrum of <b>6</b> in $\text{CD}_2\text{Cl}_2$ .....                                                                         | 31 |
| <b>Figure S34.</b> $^{11}\text{B}$ NMR spectrum of <b>6</b> in $\text{CD}_2\text{Cl}_2$ .....                                                                         | 32 |
| <b>Figure S35.</b> $^1\text{H}$ NMR spectrum of <b>7</b> in $\text{CD}_2\text{Cl}_2$ .....                                                                            | 32 |
| <b>Figure S36.</b> $^{13}\text{C}$ NMR spectrum of <b>7</b> in $\text{CD}_2\text{Cl}_2$ .....                                                                         | 33 |
| <b>Figure S37.</b> $^{31}\text{P}$ NMR spectrum of <b>7</b> in $\text{CD}_2\text{Cl}_2$ .....                                                                         | 33 |
| <b>Figure S38.</b> $^{19}\text{F}$ NMR spectrum of <b>7</b> in $\text{CD}_2\text{Cl}_2$ .....                                                                         | 34 |
| <b>Figure S39.</b> $^{11}\text{B}$ NMR spectrum of <b>7</b> in $\text{CD}_2\text{Cl}_2$ .....                                                                         | 34 |
| <b>Figure S40.</b> $^1\text{H}$ NMR spectrum ( $\text{CDCl}_3$ ) of the NacnacH isolated from the reaction of <b>1</b> and dimethyl maleate at room temperature ..... | 35 |
| <b>Figure S41.</b> HRMS spectrum of <b>1</b> .....                                                                                                                    | 35 |
| <b>Figure S42.</b> HRMS spectrum of <b>2</b> .....                                                                                                                    | 36 |
| <b>Figure S43.</b> HRMS spectrum of <b>3</b> .....                                                                                                                    | 36 |
| <b>Figure S44.</b> HRMS spectrum of <b>5</b> .....                                                                                                                    | 36 |
| <b>Figure S45.</b> HRMS spectrum of <b>6</b> .....                                                                                                                    | 37 |
| <b>Figure S46.</b> HRMS spectrum of <b>7</b> .....                                                                                                                    | 37 |
| Reference .....                                                                                                                                                       | 38 |

## General Information

All manipulations were carried out on a Schlenk line or in an argon atmosphere glovebox. Solvents were dried using a MBraun solvent purification system, and stored over 3 Å sieves. Unless otherwise stated, commercial reagents were used without further purification.  $\text{CH}\{(\text{CMe})(2,6\text{-}i\text{Pr}_2\text{C}_6\text{H}_3\text{N})\}_2\text{SnCl}^{[S1]}$  and  $\text{NaPCO}(\text{dioxane})^{[S2]}$  were synthesized according to the literature methods.  $^1\text{H}$ ,  $^{19}\text{F}$ ,  $^{31}\text{P}$ ,  $^{11}\text{B}$  and  $^{13}\text{C}$  NMR spectra were recorded on a Bruker Ascend 500M or Bruker Advance 400M spectrometer. HRMS were recorded on a Thermo Scientific TM Q-Exactive Plus<sup>TM</sup> mass spectrometer. Single-crystal X-ray diffraction data were collected on a Bruker D8 QUEST diffractometer using Cu (60W, Diamond,  $\mu\text{K}\alpha = 12.894 \text{ mm}^{-1}$ ) micro-focus X-ray sources. Using Olex2,<sup>[S3]</sup> the structure was solved with the XT<sup>[S4]</sup> structure solution program using Intrinsic Phasing and refined with the XL<sup>[S5]</sup> refinement package using Least Squares minimisation.

## Experimental Section

Synthesis of **1**:

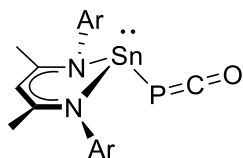

A mixture of NaPCO(dioxane)<sub>x</sub> (4 mmol, 30.6% wt., 1071 mg) and toluene (10 mL) was added into a toluene solution (10 mL) of NaCNacSnCl (4 mmol, 2287 mg). The resulting orange reaction mixture was stirred at room temperature overnight. After filtration, the solvent was removed under vacuum, and the residues were washed with hexane to give pale yellow powders of **1** (1970 mg, 83% yield). Colorless crystals were obtained by storage a solution of **1** in hexane/toluene at -30 °C overnight. <sup>1</sup>H NMR (500 MHz, C<sub>6</sub>D<sub>6</sub>, ppm): δ 7.14-7.10 (m, 4H, ArH), 7.07-7.04 (m, 2H, ArH), 4.93 (s, 1H, γ-H), 3.91-3.85 (m, 2H, ArCHMe<sub>2</sub>), 3.24-3.17 (m, 2H, ArCHMe<sub>2</sub>), 1.53 (s, 6H, β-Me), 1.44 (d, *J* = 6.79 Hz, 6H, CHMe<sub>2</sub>), 1.23-1.21 (m, 12H, CHMe<sub>2</sub>, overlapped), 1.05 (d, *J* = 6.80 Hz, 6H, CHMe<sub>2</sub>). <sup>13</sup>C {<sup>1</sup>H} NMR (125 MHz, C<sub>6</sub>D<sub>6</sub>, ppm): δ 189.4 (d, *J* = 91.10 Hz, PCO), 167.5 (CN), 146.0, 143.1, 141.5, 127.7, 125.4, 124.1 (Ar), 101.8 (γ-C), 29.3 (d, *J* = 6.83 Hz, β-Me), 28.5 (CHMe<sub>2</sub>), 24.7, 23.9 (CHMe<sub>2</sub>). <sup>31</sup>P {<sup>1</sup>H} NMR (202 MHz, C<sub>6</sub>D<sub>6</sub>, ppm) δ -316.8. HRMS (*m/z*): HRMS (*m/z*): [M+Na]<sup>+</sup> Calcd. for C<sub>30</sub>H<sub>41</sub>SnN<sub>2</sub>OPNa<sup>+</sup>: 619.1871; Found: 619.1893.

Synthesis of **2**:

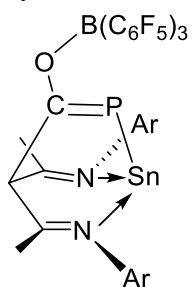

A mixture of **1** (0.1 mmol, 60 mg), B(C<sub>6</sub>F<sub>5</sub>)<sub>3</sub> (51 mg, 0.1 mmol) and toluene (5 mL) was stirred at ambient temperature for 2 h. The resulting yellow solution was storing at -30 °C overnight to afford orange crystals of **2**. The crystals were collected and wash with cool hexane and dry *in vacuo* for 2 hours (40 mg, 47%). <sup>1</sup>H NMR (500 MHz, CDCl<sub>3</sub>, ppm): δ 7.32-7.30 (m, 4H, ArH), 7.28-7.26 (m, 2H, ArH), 5.33 (s, 1H, γ-H), 3.41 (br, 4H, CHMe<sub>2</sub>), 1.89 (s, 6H, β-Me), 1.31 (d, *J* = 6.8 Hz, 12H, CHMe<sub>2</sub>), 1.20 (d, *J* = 6.8 Hz, 12H, CHMe<sub>2</sub>). <sup>13</sup>C{<sup>1</sup>H} NMR (126 MHz, CDCl<sub>3</sub>, ppm): δ 189.0-187.43 (m, P-C-O), 167.2 (CN), 144.4, 144.0, 127.3, 124.6 (Ar), 101.5 (γ-CH), 29.0, 26.4, 24.3, 24.2 (CHMe<sub>2</sub>, β-Me, CHMe<sub>2</sub>). <sup>31</sup>P{<sup>1</sup>H} NMR (202 MHz, CDCl<sub>3</sub>, ppm): δ -320.0. <sup>19</sup>F{<sup>1</sup>H} NMR (471 MHz, CDCl<sub>3</sub>, ppm) δ -128.1 (6F, *o*-C<sub>6</sub>F<sub>5</sub>), -143.8 (3F, *p*-C<sub>6</sub>F<sub>5</sub>), -160.9 (6F, *m*-C<sub>6</sub>F<sub>5</sub>). <sup>11</sup>B{<sup>1</sup>H} NMR (160 MHz, CDCl<sub>3</sub>) δ 56.9. HRMS (*m/z*): [M - H]<sup>-</sup> Calcd. for C<sub>48</sub>H<sub>40</sub>ON<sub>2</sub>BF<sub>15</sub>PSn<sup>-</sup>: 1107.1759; Found: 1107.1730.

Synthesis of **3**:

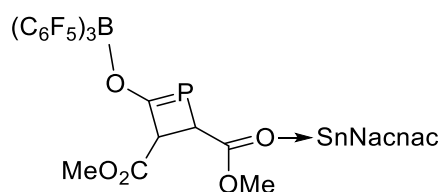

At -30 °C, a toluene (3 mL) solution of  $B(C_6F_5)_3$  (0.1 mmol, 51 mg) was added slowly into a toluene (3 mL) solution of **1** (0.1 mmol, 60 mg) and dimethyl fumarate (0.1 mmol, 14 mg). The reaction mixture was stirred at -30 °C for additional 2 hours, and the floccules were filtrated. The resulting brown solution was stored at -30 °C for 24 hours till colorless crystals of **3** (42 mg, 61%) were obtained and isolated.  $^1H$  NMR (500 MHz,  $CD_2Cl_2$ , ppm):  $\delta$  7.38 (t,  $J = 7.70$  Hz, 2H, ArH), 7.29 (d,  $J = 7.70$  Hz, 4H, ArH), 5.85 (s, 1 H,  $\gamma$ -H), 4.72 (d,  $J = 5.60$  Hz, 1H, P-CH-COOMe), 3.82 (s, 3H, O-Me), 3.72 (s, 3H, O-Me), 3.54 (s, 1H, CO-CH-CH-P), 2.72 (sept,  $J = 6.91$  Hz, 4H,  $CHMe_2$ ), 2.00 (s, 6 H,  $\beta$ -Me), 1.14 (t,  $J = 6.66$  Hz, 24 H,  $CHMe_2$ ).  $^{13}C\{^1H\}$  NMR (126 MHz,  $CD_2Cl_2$ , ppm):  $\delta$  184.5 (P-C=O-B), 171.9, 171.4 (C(O)OMe), 168.9 (CN), 163.9 (C(O)OMe), 149.6-147.7 (m,  $C_6F_5$ ), 144.0 (Ar), 140.7 (br,  $C_6F_5$ ), 139.0 (Ar), 138.1-136.3 (m,  $C_6F_5$ ), 129.0 (Ar), 125.3 (Ar), 120.1 (br,  $C_6F_5$ ), 104.2 ( $\gamma$ -C), 60.4, 56.0 (C(O)OMe), 52.8 (C(O)CP), 34.0 (C(O)CC=OB), 29.1, 25.8, 24.5, 24.1 ( $CHMe_2$ ,  $\beta$ -Me,  $CHMe_2$ ).  $^{31}P\{^1H\}$  NMR (202 MHz,  $CD_2Cl_2$ , ppm):  $\delta$  193.9.  $^{19}F\{^1H\}$  NMR (471 MHz,  $CD_2Cl_2$ , ppm)  $\delta$  -134.8 (br, 6F, *o*- $C_6F_5$ ), -162.1 (br, 3F, *p*- $C_6F_5$ ), -166.9 (br, 6F, *m*- $C_6F_5$ ).  $^{11}B\{^1H\}$  NMR (160 MHz,  $CD_2Cl_2$ , ppm)  $\delta$  -2.0. HRMS ( $m/z$ ):  $[M + H]^+$  Calcd. for  $C_{54}H_{50}SnN_2F_{15}BO_5P^+$ : 1253.2328; Found: 1253.2310.

Synthesis of **4**:

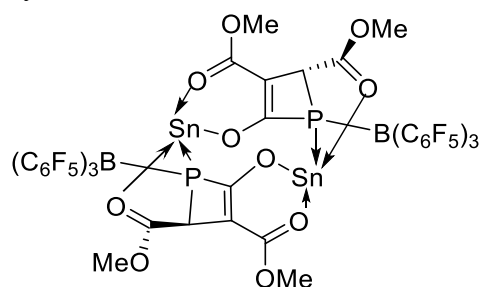

A solution of **1** (0.1 mmol, 60 mg), dimethyl fumarate (0.1 mmol, 14 mg) and  $\text{B}(\text{C}_6\text{F}_5)_3$  (0.1 mmol, 51 mg) in toluene (10 mL) was sealed and stirred at 35 °C for 48 hours. The reaction mixture was filtrated, and the resulting brown solution was concentrated to about 5 mL. After storing the brown solution at room temperature for 2 hours, colorless crystals of **4** were obtained, collected and washed with cool toluene (35 mg, 42%).  $^1\text{H}$  NMR (500 MHz,  $\text{CD}_2\text{Cl}_2$ , ppm):  $\delta$  3.94 (s, 6H,  $\text{CH}_3$ ), 3.65 (s, 6H,  $\text{CH}_3$ ), 3.33 (s, 2H, P- $\text{CH}$ -CO).  $^{13}\text{C}\{^1\text{H}\}$  NMR (125 MHz,  $\text{CD}_2\text{Cl}_2$ , ppm):  $\delta$  180.8 (MeOC=O), 163.4 (d,  $J = 14.3$  Hz, P-C=C-CO), 149.2-147.3, 138.3-136.5 (m,  $\text{C}_6\text{F}_5$ ), 106.2-106.0 (d,  $J = 16.0$  Hz, P-C-C-CO), 55.7, 53.4 (OMe), 36.2 (P-C-CO).  $^{31}\text{P}\{^1\text{H}\}$  NMR (202 MHz,  $\text{CD}_2\text{Cl}_2$ , ppm): 57.3.  $^{19}\text{F}\{^1\text{H}\}$  NMR (470 MHz,  $\text{CD}_2\text{Cl}_2$ , ppm)  $\delta$  -131.0 (t,  $J = 20.0$  Hz, 12F, *o*- $\text{C}_6\text{F}_5$ ), -157.6 (t,  $J = 20.2$  Hz, 6F, *p*- $\text{C}_6\text{F}_5$ ), -163.8 (t,  $J = 18.7$  Hz, 12F, *m*- $\text{C}_6\text{F}_5$ ).  $^{11}\text{B}\{^1\text{H}\}$  NMR (160 MHz,  $\text{CD}_2\text{Cl}_2$ )  $\delta$  -15.2.



Synthesis of **5**:

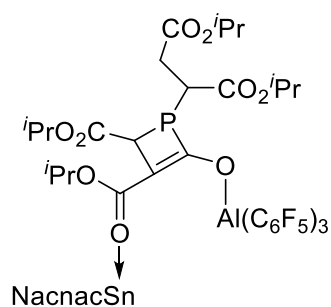

A solution of  $\text{Al}(\text{C}_6\text{F}_5)_3 \cdot 0.5\text{Tol}$  (0.1 mmol, 57 mg) in toluene (2 mL) was added dropwise into a solution of **1** (0.1 mmol, 60 mg) and diisopropyl fumarate (0.2 mmol, 34 mg) in toluene (5 mL) at ambient temperature. The resulting yellow reaction mixture was stirred overnight and became orange. The solvent was removed under vacuum to afford yellowish residues. The residues were further washed with hexane and recrystallized in toluene/*n*-hexane to give colorless crystals of **5** (67 mg, 52%).  $^1\text{H}$  NMR (500 MHz,  $\text{C}_6\text{D}_6$ , ppm):  $\delta$  7.29 (q,  $J = 7.4$  Hz, 2H, *Ar*), 7.04 (dd,  $J = 29.6, 7.6$  Hz, 4H, *Ar*), 5.09-4.95 (m, 4H,  $\text{OCHMe}_2$ ), 4.84 (s, 1H,  $\gamma\text{-H}$ ), 3.38 (s, 1H,  $\text{PCHC}(\text{O})\text{O}$ ), 3.15-3.09 (m, 1H,  $\text{C}=\text{CPCHC}$ ), 2.90-2.86 (m, 2H,  $\text{CHMe}$ ), 2.77-2.71 (m, 1H,  $\text{CHMe}$ ), 2.63 (d,  $J = 16.2$  Hz, 2H,  $\text{C}=\text{CPCCH}_2$ ), 2.60-2.55 (m, 1H,  $\text{CHMe}$ ), 1.57 (d,  $J = 6.6$  Hz, 3H,  $\text{CHMe}$ ), 1.37 (d,  $J = 18.9$  Hz, 6H,  $\beta\text{-Me}$ ), 1.25-0.86 (m, 45H,  $\text{CHMe}$ ).  $^{13}\text{C}\{^1\text{H}\}$  NMR (126 MHz,  $\text{C}_6\text{D}_6$ , ppm):  $\delta$  194.2 (P-C-O-Al), 171.6, 171.1, 170.7, 169.9 ( $\text{C}(\text{O})\text{O}^i\text{Pr}$ ), 167.0, 166.1 (CN), 162.8 (P-C=C), 144.4, 143.7, 142.3, 141.7, 125.4, 124.8, 124.7, 124.4 (*Ar*), 110.2 ( $\gamma\text{-C}$ ), 70.3, 69.1, 68.5, 68.1 ( $\text{OCH}(\text{CH}_3)_2$ ), 49.1, 39.7 (P-C), 32.4 (P-C-C-C=O), 29.6, 28.6, 28.2, 26.5, 25.9, 24.5, 24.3, 23.7, 23.5, 23.3, 21.9, 21.8, 21.7, 21.6, 21.5, 21.4 ( $\text{O-CHMe}_2$ ,  $\beta\text{-Me}$ ,  $\text{CHMe}_2$ ,  $\text{CHMe}_2$ ).  $^{31}\text{P}\{^1\text{H}\}$  NMR (202 MHz,  $\text{C}_6\text{D}_6$ , ppm):  $\delta$  44.5.  $^{19}\text{F}\{^1\text{H}\}$  NMR (471 MHz,  $\text{C}_6\text{D}_6$ , ppm)  $\delta$  -120.9 (br, 6F, *o*- $\text{C}_6\text{F}_5$ ), -153.4 (br, 3F, *p*- $\text{C}_6\text{F}_5$ ), -160.8 (br, 6F, *m*- $\text{C}_6\text{F}_5$ ). HRMS ( $m/z$ ):  $[\text{M} + \text{H}]^+$  Calcd. for  $\text{C}_{68}\text{H}_{74}\text{AlF}_{15}\text{N}_2\text{O}_9\text{PSn}$ : 1525.3725; Found: 1525.3724.

Synthesis of **6**:

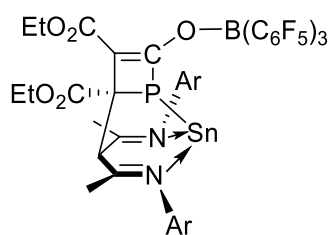

A solution of  $B(C_6F_5)_3$  (0.1 mmol, 51 mg) in toluene (2 mL) was added dropwise into a solution of **1** (0.1 mmol, 60 mg) and diethyl acetylenedicarboxylate (0.1 mmol, 17 mg) in toluene (5 mL) at  $-30\text{ }^\circ\text{C}$ . The yellow reaction mixture was allowed to warm to ambient temperature and was stirred for further 2 hours. The resulting brown suspension was filtered and the residues were washed with hexane to give light yellow powders of **6** (74 mg, 57%).  $^1\text{H}$  NMR (500 MHz,  $\text{CD}_2\text{Cl}_2$ , ppm):  $\delta$  7.38 (q,  $J = 7.7$  Hz, 2H, ArH), 7.30 (ddd,  $J = 9.5, 7.9, 1.6$  Hz, 2H, ArH), 7.23 (ddd,  $J = 9.0, 7.7, 1.6$  Hz, 2H, ArH), 5.77 (d,  $J = 6.8$  Hz, 1H,  $\gamma$ -H), 4.26-4.20 (m, 1H,  $\text{OCH}_2\text{Me}$ ), 4.19-4.14 (m, 1H,  $\text{OCH}_2\text{Me}$ ), 4.12-4.05 (m, 1H,  $\text{OCH}_2\text{Me}$ ), 4.02-3.96 (m, 1H,  $\text{OCH}_2\text{Me}$ ), 2.65-2.59 (m, 1H,  $\text{CHMe}_2$ ), 2.55 (s, 3H,  $\beta$ -Me), 2.58-2.52 (m, 1H,  $\text{CHMe}_2$ ), 2.4-2.36 (m, 1H,  $\text{CHMe}_2$ ), 2.33 (s, 3H,  $\beta$ -Me), 2.08-2.04 (m, 1H,  $\text{CHMe}_2$ ), 1.35 (d,  $J = 6.1$  Hz, 3H,  $\text{CHMe}_2$ ), 1.28 (d,  $J = 6.7$  Hz, 3H,  $\text{CHMe}_2$ ), 1.23-1.17 (m, 12H,  $\text{CHMe}_2$ ), 0.99 (t,  $J = 6.7$  Hz, 6H,  $\text{OCH}_2\text{Me}$ ), 0.83 (d,  $J = 6.7$  Hz, 3H,  $\text{CHMe}_2$ ), 0.74 (d,  $J = 6.6$  Hz, 3H,  $\text{CHMe}_2$ ).  $^{13}\text{C}\{^1\text{H}\}$  NMR (126 MHz,  $\text{CD}_2\text{Cl}_2$ , ppm):  $\delta$  192.2 (P-C-O-BCF), 189.8 ( $\text{C}(\text{O})\text{OEt}$ ), 179.2, 179.0 (CN), 176.6 (d,  $J = 5.3$  Hz,  $\text{C}(\text{O})\text{OEt}$ ), 161.5 (B-O-C=C-C( $\text{O}$ )OEt), 150.0-148.0 (m,  $\text{C}_6\text{F}_5$ ), 142.6, 141.6, 141.0, 140.4, 138.6, 137.3 (m,  $\text{C}_6\text{F}_5$ ), 136.1 (br,  $\text{C}_6\text{F}_5$ ), 130.0, 129.6, 126.7, 126.1, 126.0, 125.8 (Ar), 110.8 (d,  $J = 15.4$  Hz, P-C=CC( $\text{O}$ )OEt), 62.7, 61.8 ( $\text{OCH}_2\text{Me}$ ), 59.8 ( $\gamma$ -CH), 48.9 (d,  $J = 18.3$  Hz, P-C-C( $\text{O}$ )OEt), 30.3, 30.2, 30.1, 29.8, 29.4, 27.9, 27.8, 26.7, 26.2, 26.1, 26.0, 25.5, 24.8, 24.7, 24.3, 23.5, 14.2, 13.8 ( $\text{OCH}_2\text{Me}$ ,  $\beta$ -Me,  $\text{CHMe}_2$ ,  $\text{CHMe}_2$ ).  $^{31}\text{P}\{^1\text{H}\}$  NMR (202 MHz,  $\text{CD}_2\text{Cl}_2$ , ppm):  $\delta$  34.1.  $^{19}\text{F}\{^1\text{H}\}$  NMR (471 MHz,  $\text{CD}_2\text{Cl}_2$ , ppm)  $\delta$  -131.6 (br, 6F,  $o$ - $\text{C}_6\text{F}_5$ ), -160.2 (br,

3F, *p*-C<sub>6</sub>F<sub>5</sub>), -166.0 (br, 6F, *m*-C<sub>6</sub>F<sub>5</sub>). <sup>11</sup>B{<sup>1</sup>H} NMR (160 MHz, CD<sub>2</sub>Cl<sub>2</sub>) δ -1.7. HRMS (*m/z*):

[M - H]<sup>-</sup> Calcd. for C<sub>56</sub>H<sub>50</sub>O<sub>5</sub>N<sub>2</sub>BF<sub>15</sub>PSn<sup>-</sup>: 1277.2338; Found: 1277.2350.

Synthesis of **7**:

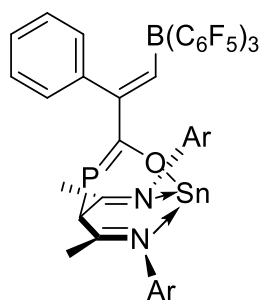

A solution of  $\text{B}(\text{C}_6\text{F}_5)_3$  (0.1 mmol, 51 mg) in toluene (2 mL) was added dropwise into a solution of **1** (0.1 mmol, 60 mg) and phenylacetylene (0.1 mmol, 10 mg) in toluene (5 mL) at  $-30\text{ }^\circ\text{C}$ . The pale-yellow reaction mixture was allowed to warm to ambient temperature and was stirred for further 2 hours. The resulting red suspension was filtered and the residues were washed with hexane to give orange powders of **7** (53 mg, 42%).  $^1\text{H}$  NMR (500 MHz,  $\text{CD}_2\text{Cl}_2$ , ppm):  $\delta$  8.06 (br, 1H, C=C-H), 7.47-7.32 (m, 6H, ArH), 7.08-6.94 (m, 5H, ArH), 4.17 (br, 1H,  $\gamma$ -H), 2.68-2.66 (m, 4H, CHMe<sub>2</sub>), 2.28 (s, 6H,  $\beta$ -Me), 1.18-1.34 (m, 24H, CHMe<sub>2</sub>, overlapped).  $^{13}\text{C}\{^1\text{H}\}$  NMR (150 MHz,  $\text{CD}_2\text{Cl}_2$ , ppm):  $\delta$  214.6 (P=CO), 174.0, 173.1 (CN), 149.4-147.6 (m, C<sub>6</sub>F<sub>5</sub>), 144.0, 140.4, 137.9, 130.2, 127.1, 126.9, 126.4, 125.2 (Ar), 111.0 ( $\gamma$ -C), 30.3, 28.1, 26.5, 24.7, 24.5 ( $\beta$ -Me, CHMe<sub>2</sub>, CHMe<sub>2</sub>).  $^{31}\text{P}\{^1\text{H}\}$  NMR (202 MHz,  $\text{CD}_2\text{Cl}_2$ , ppm):  $\delta$  109.6.  $^{19}\text{F}\{^1\text{H}\}$  NMR (470 MHz,  $\text{CD}_2\text{Cl}_2$ , ppm)  $\delta$  -130.8 (br, 6F, *o*-C<sub>6</sub>F<sub>5</sub>), -164.2 (br, 3F, *p*-C<sub>6</sub>F<sub>5</sub>), -167.9 (br, 6F, *m*-C<sub>6</sub>F<sub>5</sub>).  $^{11}\text{B}\{^1\text{H}\}$  NMR (160 MHz,  $\text{CD}_2\text{Cl}_2$ )  $\delta$  -16.4. HRMS (*m/z*): [M + H]<sup>+</sup> Calcd. For C<sub>56</sub>H<sub>48</sub>SnN<sub>2</sub>F<sub>15</sub>BOP<sup>+</sup>: 1211.2375; Found: 1211.2378.

# X-ray Crystallography

**Table S1.** Crystal data and structure refinement details for compounds **1-4**

|                                                              | <b>1</b>                                                                           | <b>2</b>                                                                            | <b>3</b>                                                                               | <b>4</b>                                                                           |
|--------------------------------------------------------------|------------------------------------------------------------------------------------|-------------------------------------------------------------------------------------|----------------------------------------------------------------------------------------|------------------------------------------------------------------------------------|
| CCDC                                                         | 2195054                                                                            | 2263622                                                                             | 2263623                                                                                | 2263624                                                                            |
| Empirical formula                                            | C <sub>30</sub> H <sub>41</sub> N <sub>2</sub> OPSn                                | C <sub>65</sub> H <sub>60</sub> BF <sub>15</sub> N <sub>2</sub> OPSn                | C <sub>68.2</sub> H <sub>64.2</sub> BF <sub>15</sub> N <sub>2</sub> O <sub>5</sub> PSn | C <sub>32</sub> H <sub>15</sub> BF <sub>15</sub> O <sub>5</sub> PSn                |
| Formula weight                                               | 595.31                                                                             | 1330.62                                                                             | 1437.28                                                                                | 924.91                                                                             |
| Temperature, K                                               | 273                                                                                | 150                                                                                 | 150                                                                                    | 150                                                                                |
| Crystal system                                               | triclinic                                                                          | monoclinic                                                                          | triclinic                                                                              | triclinic                                                                          |
| Space group                                                  | P-1                                                                                | P2 <sub>1</sub> /n                                                                  | P-1                                                                                    | P-1                                                                                |
| <i>a</i> , Å                                                 | 9.076(11)                                                                          | 15.5036(7)                                                                          | 14.6414(9)                                                                             | 11.5863(5)                                                                         |
| <i>b</i> , Å                                                 | 11.89(2)                                                                           | 25.6431(12)                                                                         | 15.4756(10)                                                                            | 12.5598(6)                                                                         |
| <i>c</i> , Å                                                 | 14.910(14)                                                                         | 15.6976(7)                                                                          | 17.6749(14)                                                                            | 13.4404(6)                                                                         |
| <i>α</i> , deg                                               | 96.70(9)                                                                           | 90                                                                                  | 100.891(4)                                                                             | 99.900(3)                                                                          |
| <i>β</i> , deg                                               | 98.19(9)                                                                           | 91.655(2)                                                                           | 108.982(4)                                                                             | 114.828(2)                                                                         |
| <i>γ</i> , deg                                               | 110.74(12)                                                                         | 90                                                                                  | 111.357(3)                                                                             | 103.138(2)                                                                         |
| <i>V</i> , Å <sup>3</sup>                                    | 1465(4)                                                                            | 6238.1(5)                                                                           | 3305.2(4)                                                                              | 1647.63(13)                                                                        |
| <i>Z</i>                                                     | 2                                                                                  | 4                                                                                   | 2                                                                                      | 2                                                                                  |
| <i>D</i> <sub>calcd</sub> , g/cm <sup>3</sup>                | 1.350                                                                              | 1.417                                                                               | 1.444                                                                                  | 1.864                                                                              |
| <i>μ</i> /mm <sup>-1</sup>                                   | 0.951                                                                              | 4.266                                                                               | 4.117                                                                                  | 7.817                                                                              |
| <i>F</i> (000)                                               | 616.0                                                                              | 2708                                                                                | 1465                                                                                   | 904                                                                                |
| 2 $\theta$ range, deg                                        | 2.806-51.988                                                                       | 6.604 to 133.184                                                                    | 5.642 to 133.188                                                                       | 7.582 to 136.91                                                                    |
| Index ranges                                                 | -11 ≤ <i>h</i> ≤ 11,<br>-14 ≤ <i>k</i> ≤ 14,<br>-18 ≤ <i>l</i> ≤ 18,               | -18 ≤ <i>h</i> ≤ 18,<br>-30 ≤ <i>k</i> ≤ 30,<br>-18 ≤ <i>l</i> ≤ 18                 | -15 ≤ <i>h</i> ≤ 17,<br>-18 ≤ <i>k</i> ≤ 18,<br>-21 ≤ <i>l</i> ≤ 21                    | -13 ≤ <i>h</i> ≤ 13,<br>-15 ≤ <i>k</i> ≤ 15,<br>-16 ≤ <i>l</i> ≤ 16                |
| Reflections collected                                        | 11230                                                                              | 150341                                                                              | 113680                                                                                 | 61002                                                                              |
| Independent reflections                                      | 5633<br>[ <i>R</i> <sub>int</sub> = 0.0214,<br><i>R</i> <sub>sigma</sub> = 0.0331] | 11017<br>[ <i>R</i> <sub>int</sub> = 0.0482,<br><i>R</i> <sub>sigma</sub> = 0.0187] | 11672<br>[ <i>R</i> <sub>int</sub> = 0.0929,<br><i>R</i> <sub>sigma</sub> = 0.0424]    | 6035<br>[ <i>R</i> <sub>int</sub> = 0.0659,<br><i>R</i> <sub>sigma</sub> = 0.0287] |
| Data/restraints/parameters                                   | 5633/0/326                                                                         | 11017/440/868                                                                       | 11672/232/896                                                                          | 6035/0/499                                                                         |
| Goodness-of-fit on <i>F</i> <sup>2</sup>                     | 1.080                                                                              | 1.024                                                                               | 1.078                                                                                  | 1.088                                                                              |
| Final <i>R</i> indexes [ <i>I</i> ≥ 2 $\sigma$ ( <i>I</i> )] | <i>R</i> <sub>1</sub> = 0.0406,<br><i>wR</i> <sub>2</sub> = 0.1014                 | <i>R</i> <sub>1</sub> = 0.0308,<br><i>wR</i> <sub>2</sub> = 0.0809                  | <i>R</i> <sub>1</sub> = 0.0560,<br><i>wR</i> <sub>2</sub> = 0.1462                     | <i>R</i> <sub>1</sub> = 0.0254,<br><i>wR</i> <sub>2</sub> = 0.0653                 |
| Final <i>R</i> indexes [all data]                            | <i>R</i> <sub>1</sub> = 0.0438,<br><i>wR</i> <sub>2</sub> = 0.1031                 | <i>R</i> <sub>1</sub> = 0.0317,<br><i>wR</i> <sub>2</sub> = 0.0816                  | <i>R</i> <sub>1</sub> = 0.0612,<br><i>wR</i> <sub>2</sub> = 0.1498                     | <i>R</i> <sub>1</sub> = 0.0273,<br><i>wR</i> <sub>2</sub> = 0.0662                 |
| Largest diff. peak/hole, e/Å <sup>-3</sup>                   | 1.88/-0.54                                                                         | 0.71/-0.55                                                                          | 0.74/-1.33                                                                             | 0.86/-0.51                                                                         |

**Table S2.** Crystal data and structure refinement details for compounds **5-7**

|                                                       | <b>5</b>                                                                            | <b>6</b>                                                                                                 | <b>7</b>                                                                            |
|-------------------------------------------------------|-------------------------------------------------------------------------------------|----------------------------------------------------------------------------------------------------------|-------------------------------------------------------------------------------------|
| CCDC                                                  | 2264168                                                                             | 2263625                                                                                                  | 2263626                                                                             |
| Empirical formula                                     | C <sub>68</sub> H <sub>73</sub> AlF <sub>15</sub> N <sub>2</sub> O <sub>9</sub> PSn | C <sub>58.6</sub> H <sub>56.2</sub> BCl <sub>3.7</sub> F <sub>15</sub> N <sub>2</sub> O <sub>5</sub> PSn | C <sub>56</sub> H <sub>47</sub> BF <sub>15</sub> N <sub>2</sub> OPSn                |
| Formula weight                                        | 1523.92                                                                             | 1445.09                                                                                                  | 1209.42                                                                             |
| Temperature, K                                        | 150                                                                                 | 200                                                                                                      | 200                                                                                 |
| Crystal system                                        | triclinic                                                                           | monoclinic                                                                                               | triclinic                                                                           |
| Space group                                           | P-1                                                                                 | P2 <sub>1</sub> /n                                                                                       | P-1                                                                                 |
| <i>a</i> , Å                                          | 12.7892(4)                                                                          | 13.9857(3)                                                                                               | 11.4575(3)                                                                          |
| <i>b</i> , Å                                          | 21.2487(6)                                                                          | 18.8170(4)                                                                                               | 15.5646(4)                                                                          |
| <i>c</i> , Å                                          | 27.5926(9)                                                                          | 24.5153(6)                                                                                               | 16.0433(5)                                                                          |
| <i>α</i> , deg                                        | 84.417(2)                                                                           | 90                                                                                                       | 84.280(2)                                                                           |
| <i>β</i> , deg                                        | 81.544(2)                                                                           | 95.8090(10)                                                                                              | 75.467(2)                                                                           |
| <i>γ</i> , deg                                        | 89.324(2)                                                                           | 90                                                                                                       | 86.6760(10)                                                                         |
| <i>V</i> , Å <sup>3</sup>                             | 7381.7(4)                                                                           | 6418.5(2)                                                                                                | 2754.08                                                                             |
| <i>Z</i>                                              | 4                                                                                   | 4                                                                                                        | 2                                                                                   |
| <i>D</i> <sub>calcd</sub> , g/cm <sup>3</sup>         | 1.371                                                                               | 1.495                                                                                                    | 1.458                                                                               |
| <i>μ</i> /mm <sup>-1</sup>                            | 3.870                                                                               | 5.624                                                                                                    | 4.772                                                                               |
| F(000)                                                | 3120                                                                                | 2919                                                                                                     | 1220                                                                                |
| 2 $\theta$ range, deg                                 | 4.178 to 133.19                                                                     | 6.988 to 133.18                                                                                          | 5.71 to 140.34                                                                      |
| Index ranges                                          | -15 ≤ <i>h</i> ≤ 15,<br>-25 ≤ <i>k</i> ≤ 25,<br>-32 ≤ <i>l</i> ≤ 32                 | -16 ≤ <i>h</i> ≤ 16,<br>-22 ≤ <i>k</i> ≤ 22,<br>-29 ≤ <i>l</i> ≤ 29                                      | -13 ≤ <i>h</i> ≤ 13,<br>-18 ≤ <i>k</i> ≤ 18,<br>-19 ≤ <i>l</i> ≤ 19                 |
| Reflections collected                                 | 305899                                                                              | 113733                                                                                                   | 67812                                                                               |
| Independent reflections                               | 26036<br>[ <i>R</i> <sub>int</sub> = 0.0658,<br><i>R</i> <sub>sigma</sub> = 0.0266] | 11344<br>[ <i>R</i> <sub>int</sub> = 0.0959,<br><i>R</i> <sub>sigma</sub> = 0.0412]                      | 10422<br>[ <i>R</i> <sub>int</sub> = 0.0595,<br><i>R</i> <sub>sigma</sub> = 0.0332] |
| Data/restraints/parameters                            | 26036/1/1783                                                                        | 11344/52/879                                                                                             | 10422/0/704                                                                         |
| Goodness-of-fit on F <sup>2</sup>                     | 1.091                                                                               | 1.036                                                                                                    | 1.065                                                                               |
| Final R indexes [ <i>I</i> ≥ 2 $\sigma$ ( <i>I</i> )] | <i>R</i> <sub>1</sub> = 0.0445,<br><i>wR</i> <sub>2</sub> = 0.1091                  | <i>R</i> <sub>1</sub> = 0.0541,<br><i>wR</i> <sub>2</sub> = 0.1443                                       | <i>R</i> <sub>1</sub> = 0.0289,<br><i>wR</i> <sub>2</sub> = 0.0705                  |
| Final R indexes [all data]                            | <i>R</i> <sub>1</sub> = 0.0477,<br><i>wR</i> <sub>2</sub> = 0.1107                  | <i>R</i> <sub>1</sub> = 0.0650,<br><i>wR</i> <sub>2</sub> = 0.1528                                       | <i>R</i> <sub>1</sub> = 0.0326,<br><i>wR</i> <sub>2</sub> = 0.0722                  |
| Largest diff. peak/hole, e/Å <sup>-3</sup>            | 1.49/-1.15                                                                          | 1.80/-0.50                                                                                               | 0.37/-0.44                                                                          |

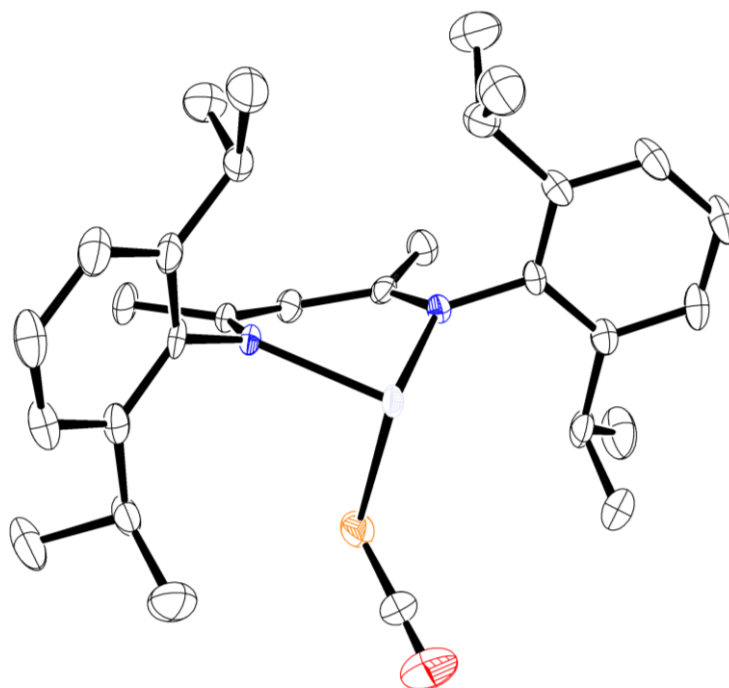

**Figure S1.** Thermal ellipsoid plot for **1** with the anisotropic displacement parameters depicted at the 50% probability level.

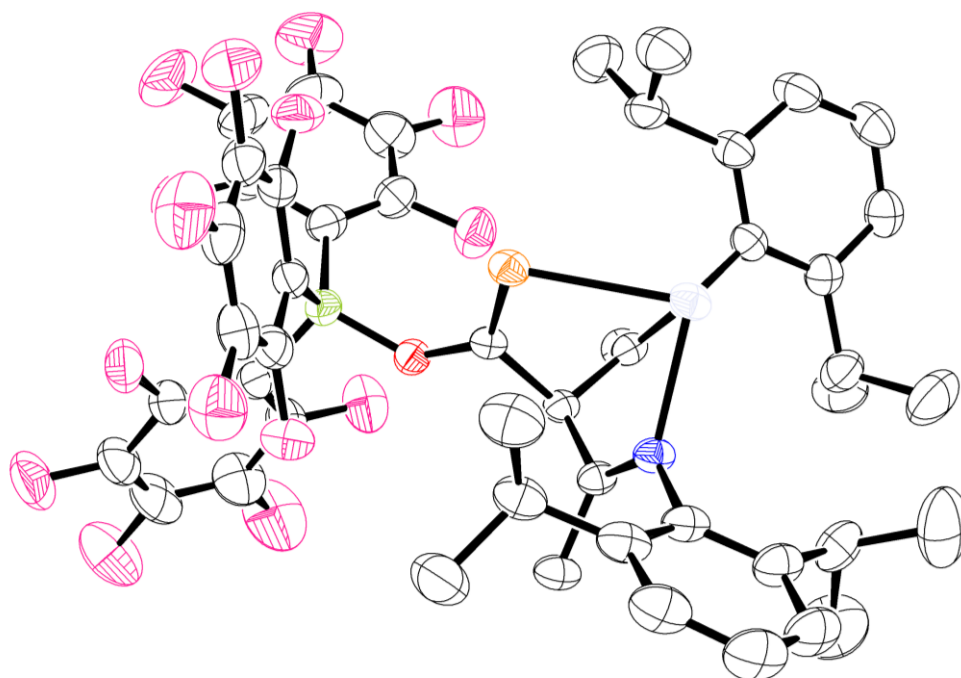

**Figure S2.** Thermal ellipsoid plot for **2** with the anisotropic displacement parameters depicted at the 50% probability level.

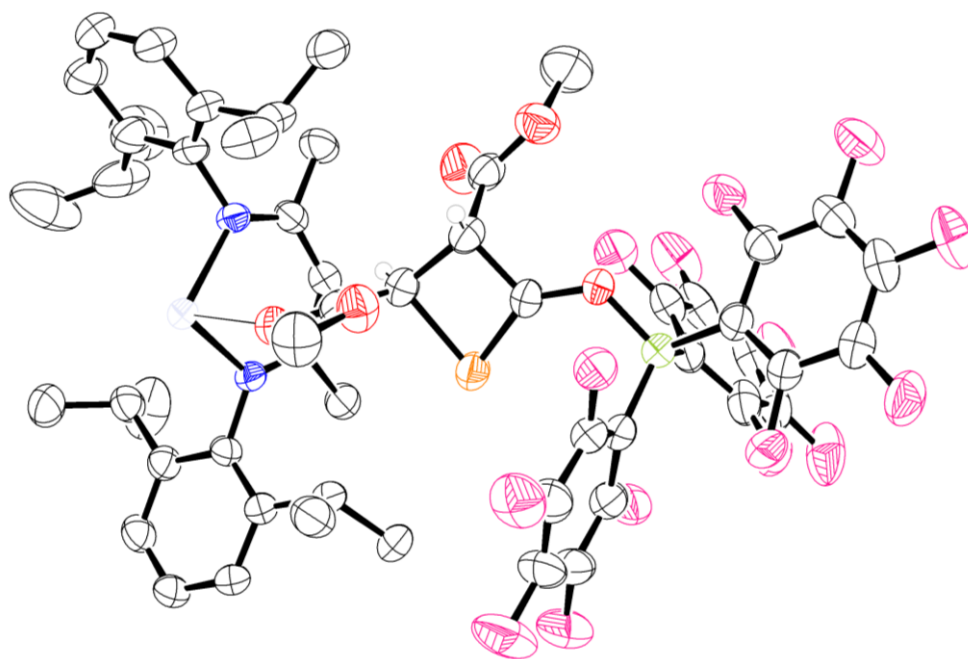

**Figure S3.** Thermal ellipsoid plot for **3** with the anisotropic displacement parameters depicted at the 50% probability level.

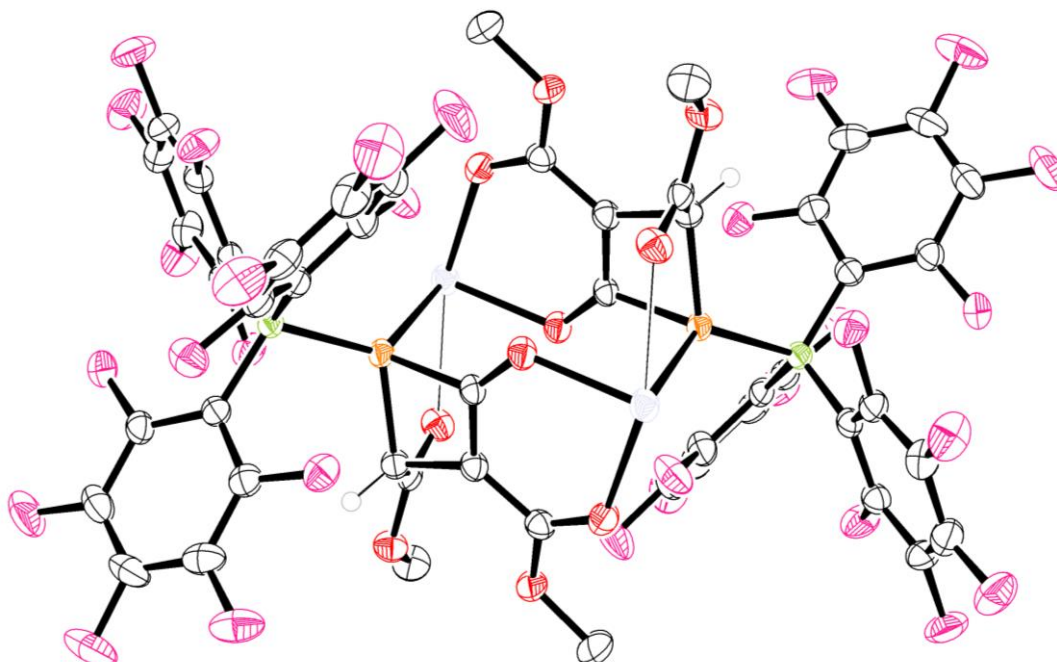

**Figure S4.** Thermal ellipsoid plot for **4** with the anisotropic displacement parameters depicted at the 50% probability level.



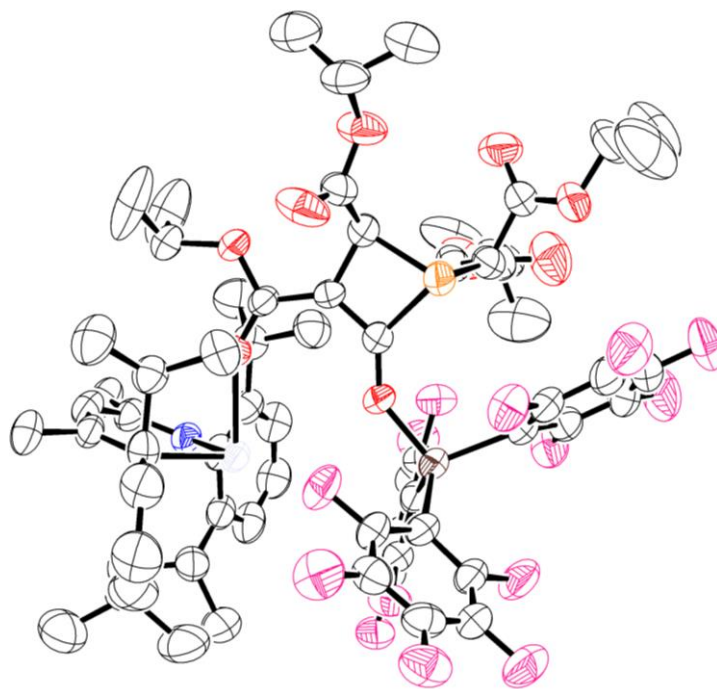

**Figure S5.** Thermal ellipsoid plot for **5** with the anisotropic displacement parameters depicted at the 50% probability level.

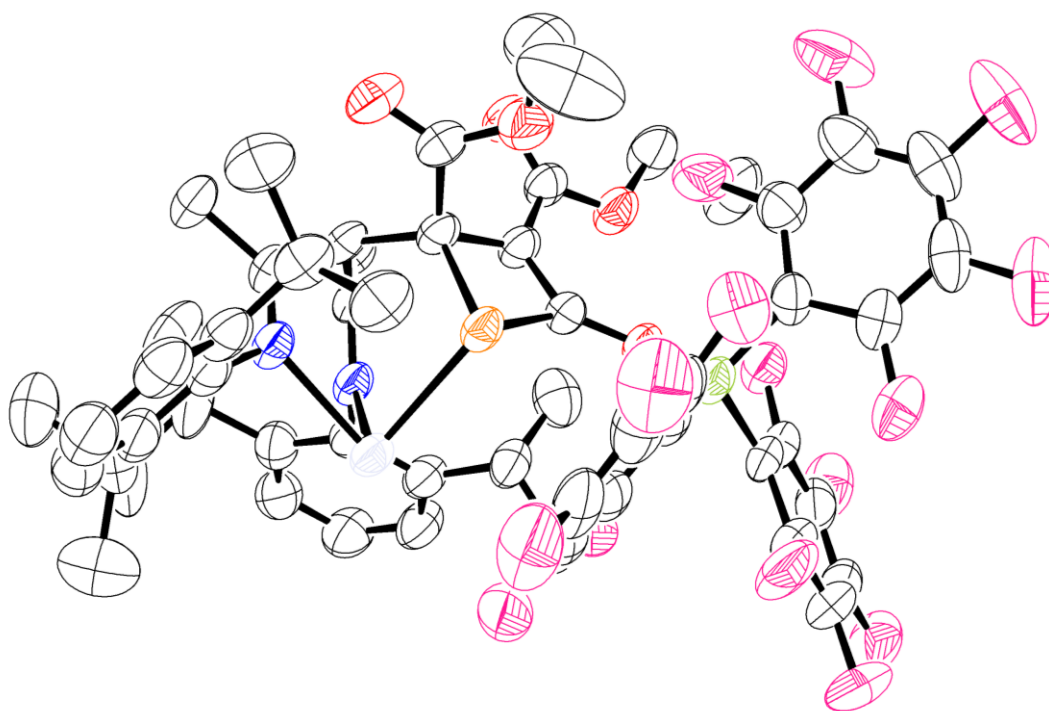

**Figure S6.** Thermal ellipsoid plot for **6** with the anisotropic displacement parameters depicted at the 50% probability level.

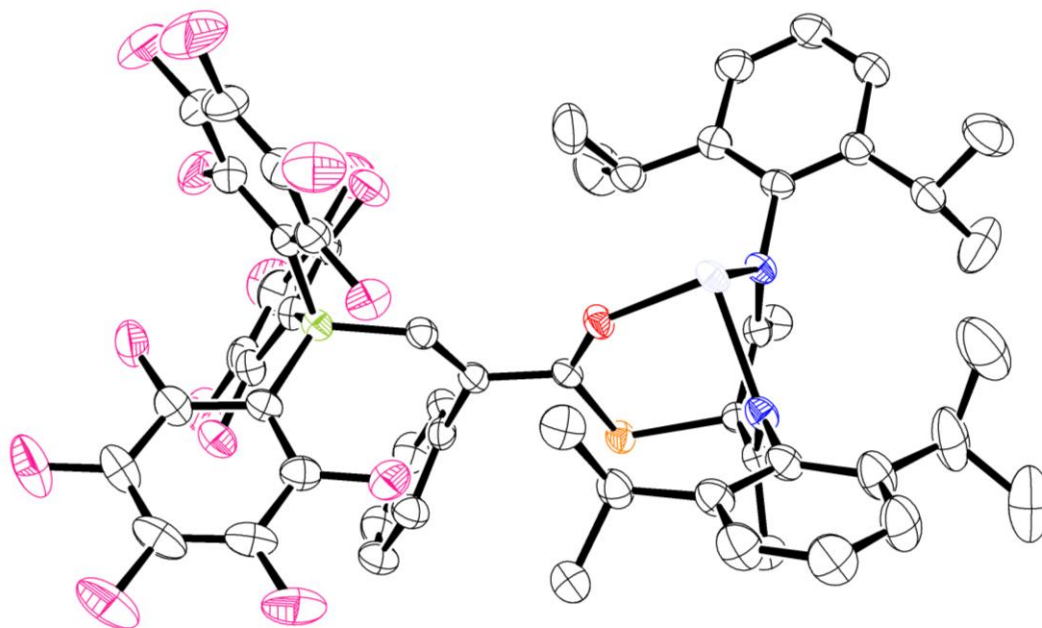

**Figure S7.** Thermal ellipsoid plot for 7 with the anisotropic displacement parameters depicted at the 50% probability level.

# NMR Spectra

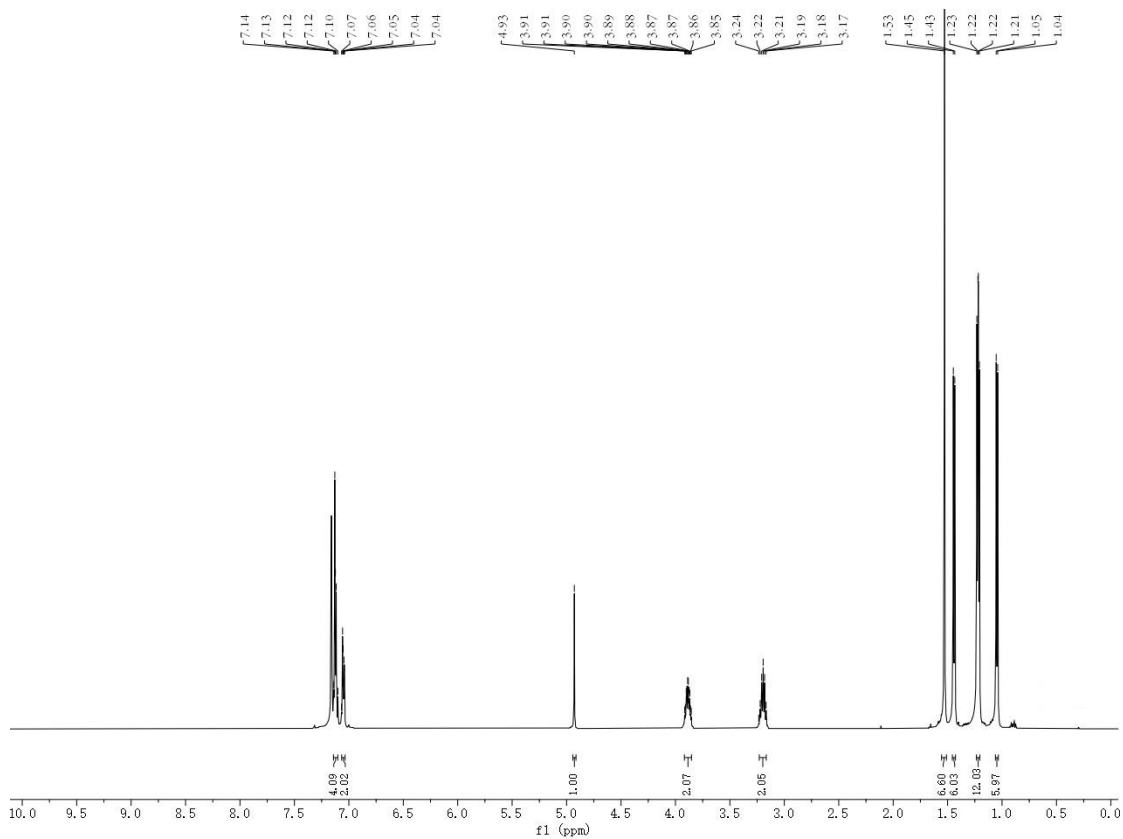

Figure S8. <sup>1</sup>H NMR spectrum of **1** in C<sub>6</sub>D<sub>6</sub>

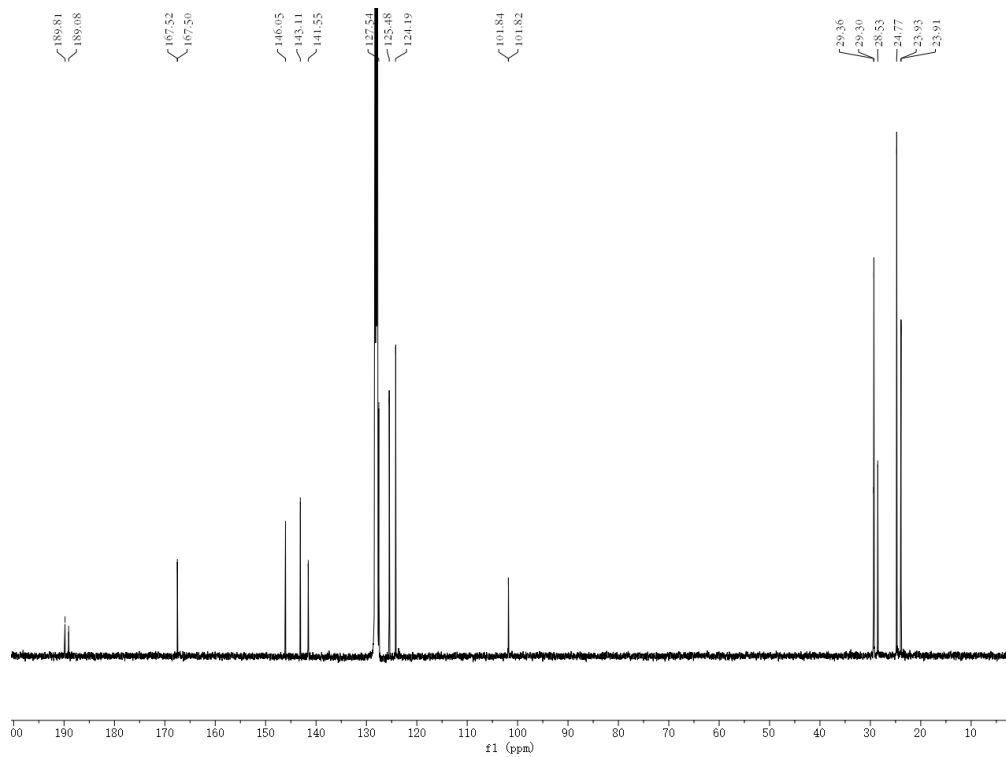

Figure S9. <sup>13</sup>C NMR spectrum of **1** in C<sub>6</sub>D<sub>6</sub>

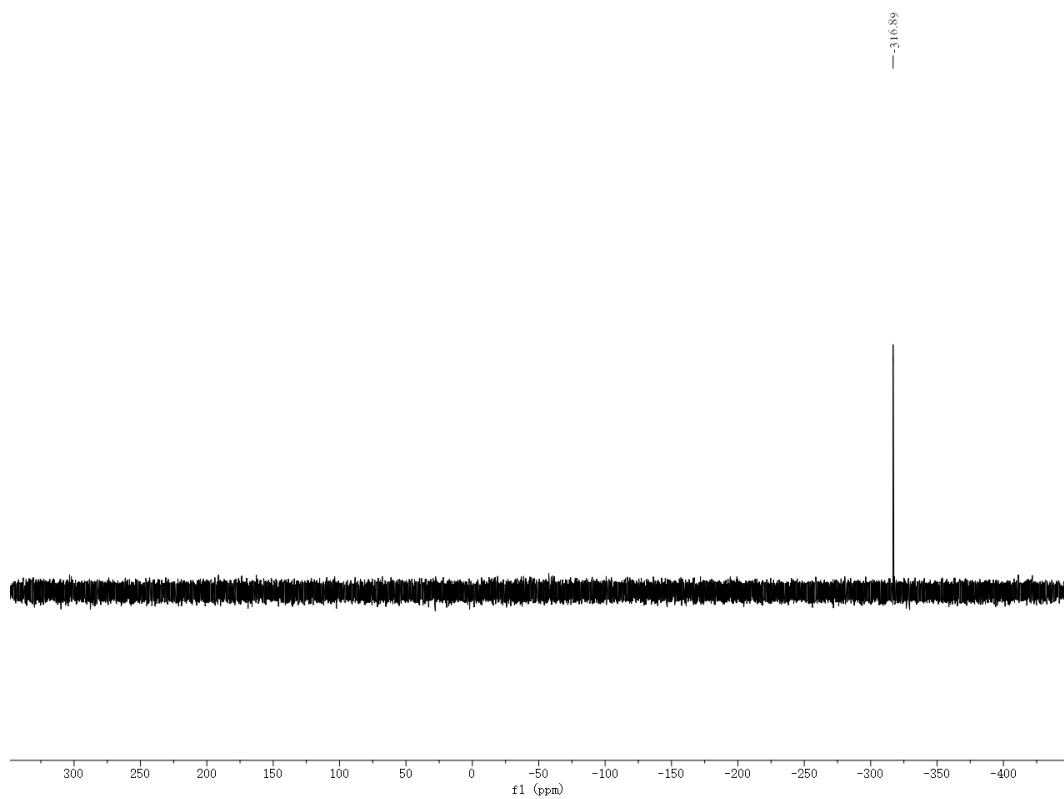

**Figure S10.**  $^{31}\text{P}$  NMR spectrum of **1** in  $\text{C}_6\text{D}_6$

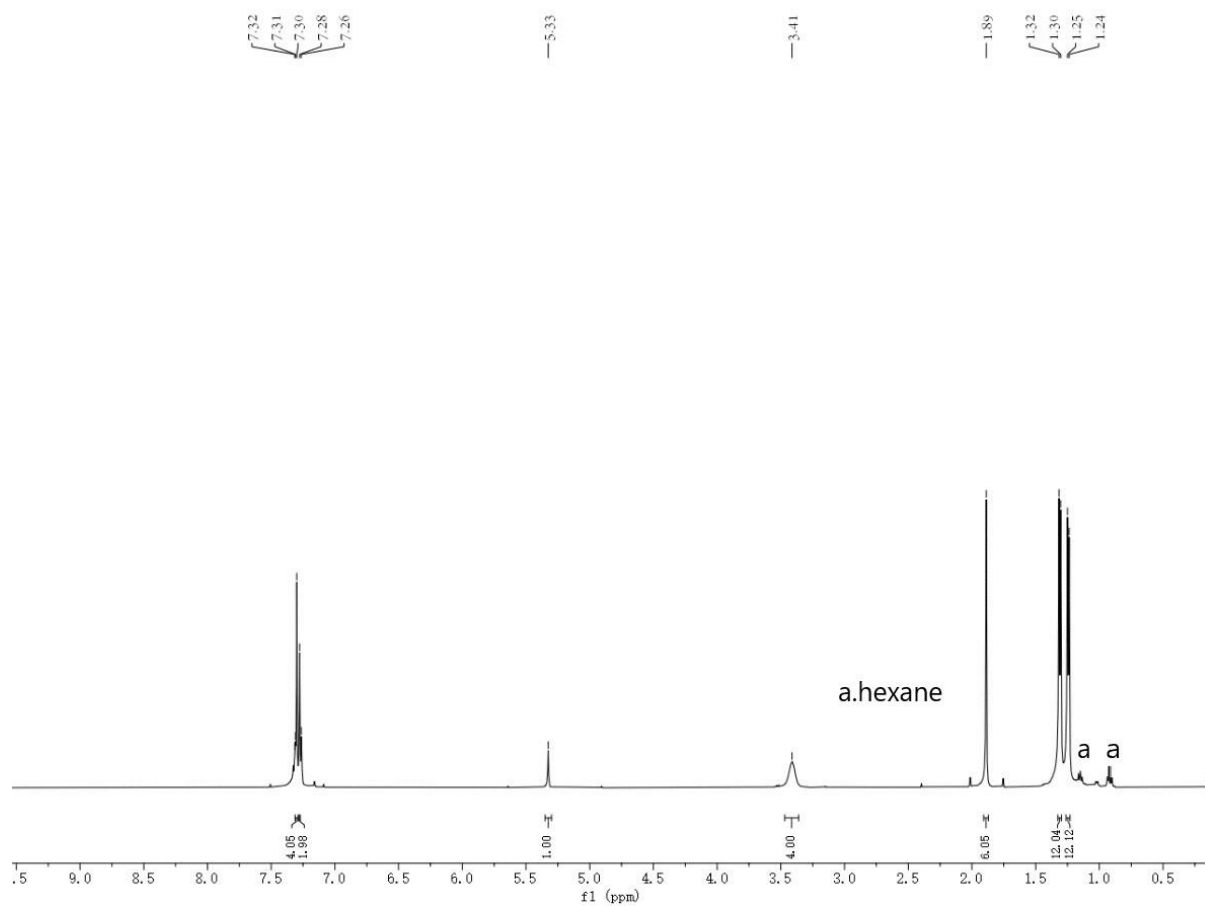

**Figure S11.**  $^1\text{H}$  NMR spectrum of **2** in  $\text{CDCl}_3$

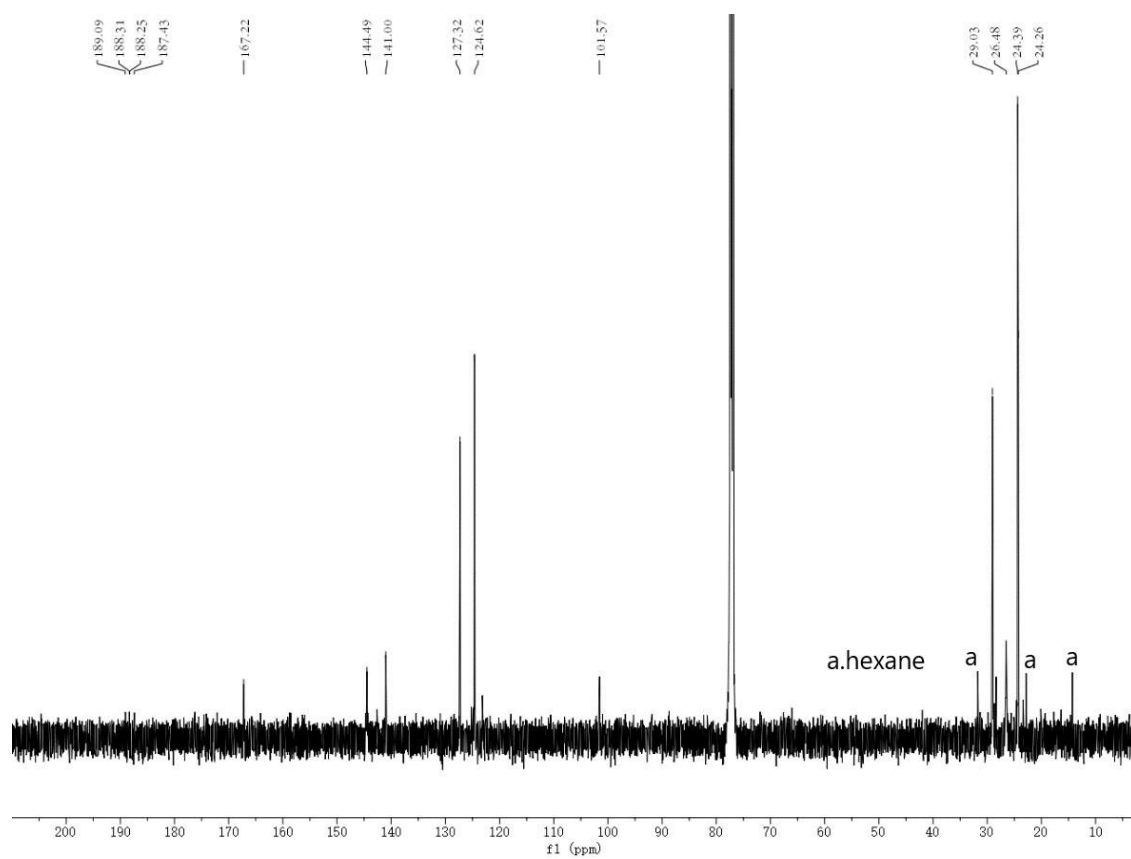

**Figure S12.**  $^{13}\text{C}$  NMR spectrum of **2** in  $\text{CDCl}_3$

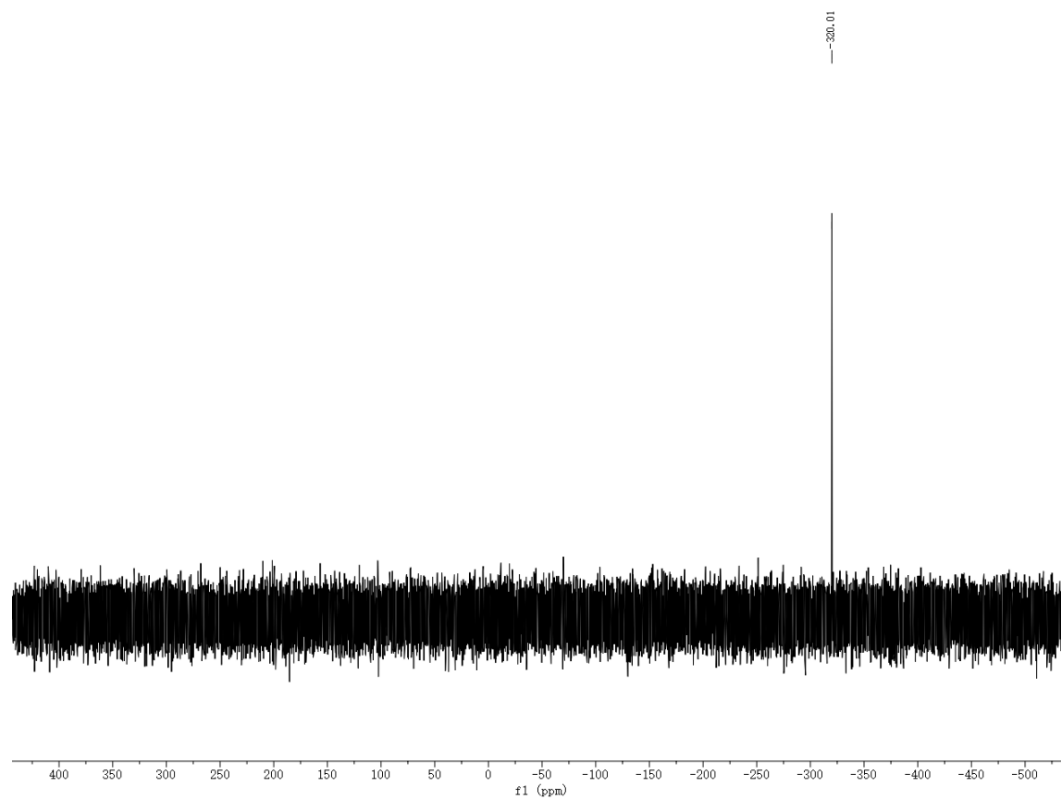

**Figure S13.**  $^{31}\text{P}$  NMR spectrum of **2** in  $\text{CDCl}_3$

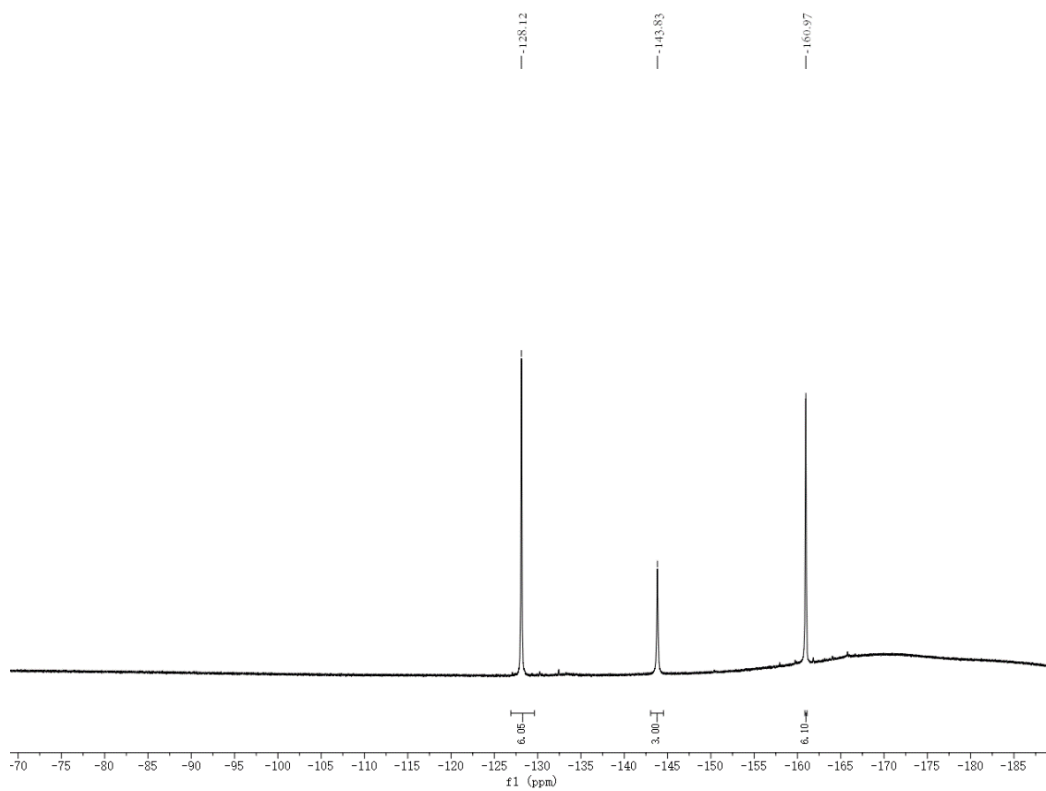

**Figure S14.**  $^{19}\text{F}$  NMR spectrum of **2** in  $\text{CDCl}_3$

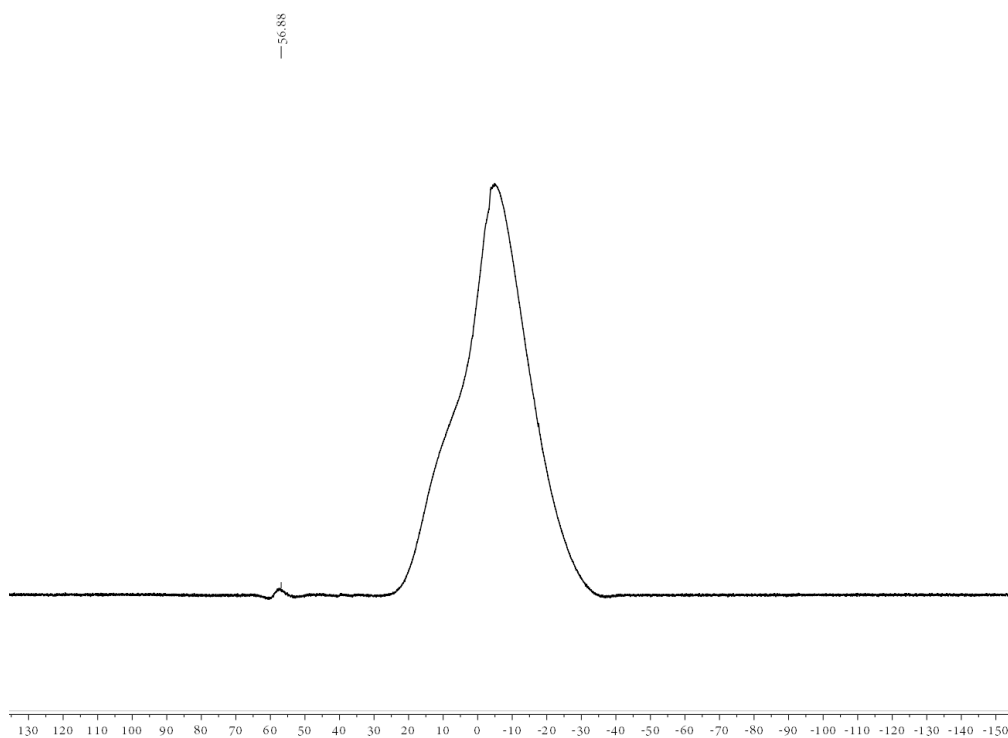

**Figure S15.**  $^{11}\text{B}$  NMR spectrum of **2** in  $\text{CDCl}_3$

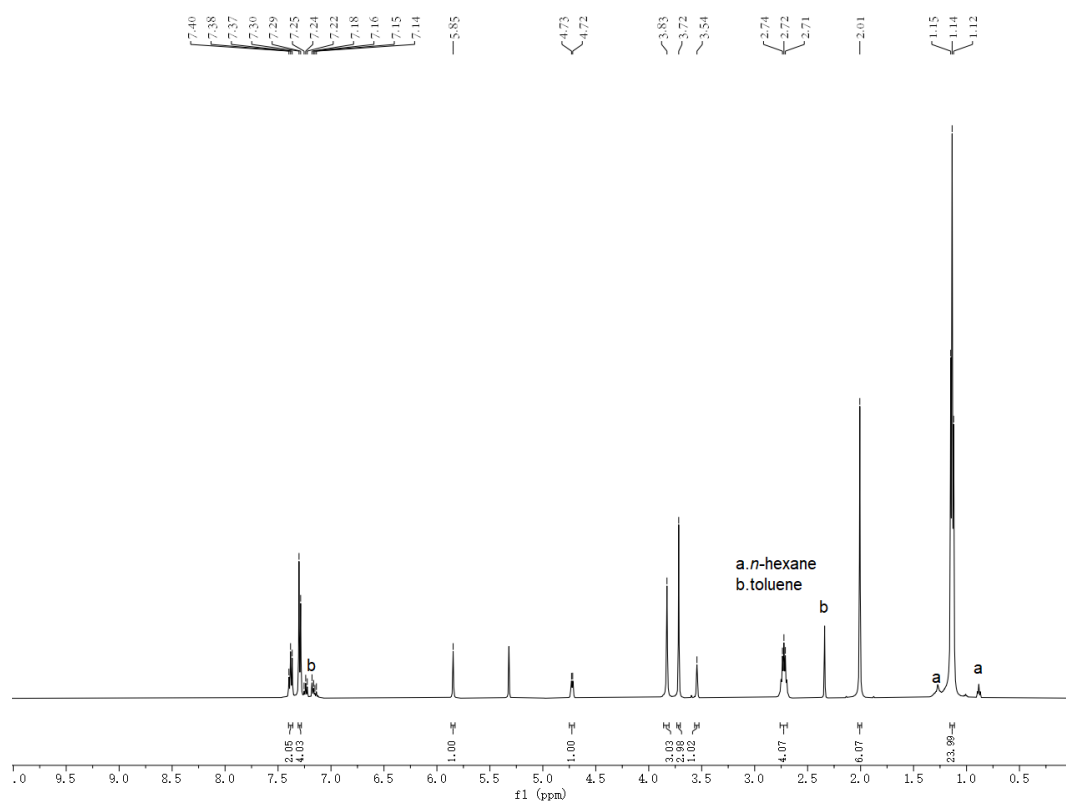

Figure S16.  $^1\text{H}$  NMR spectrum of **3** in  $\text{CD}_2\text{Cl}_2$

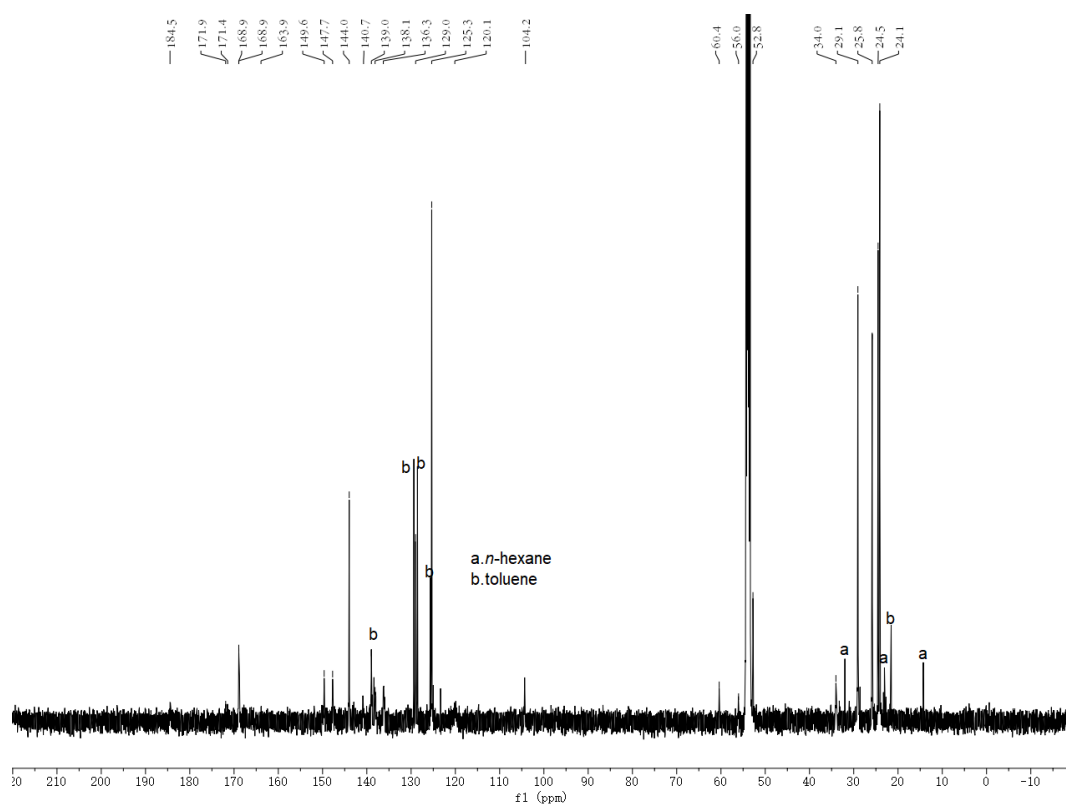

Figure S17.  $^{13}\text{C}$  NMR spectrum of **3** in  $\text{CD}_2\text{Cl}_2$

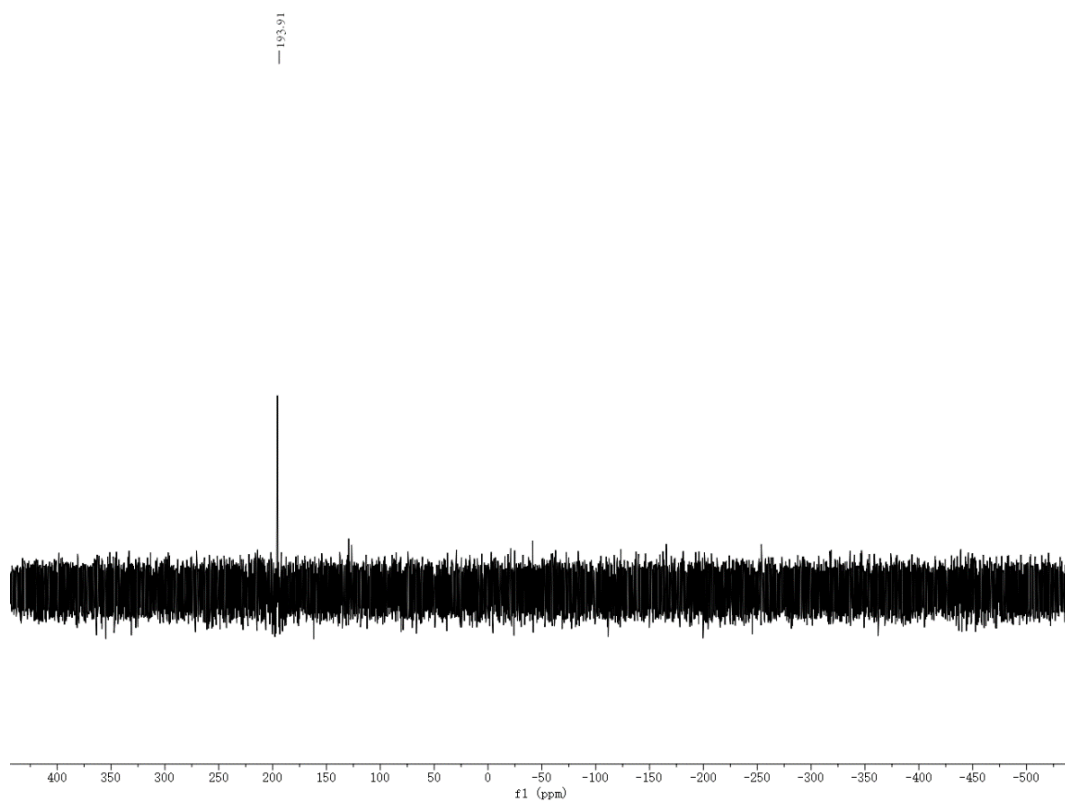

**Figure S18.**  $^{31}\text{P}$  NMR spectrum of **3** in  $\text{CD}_2\text{Cl}_2$

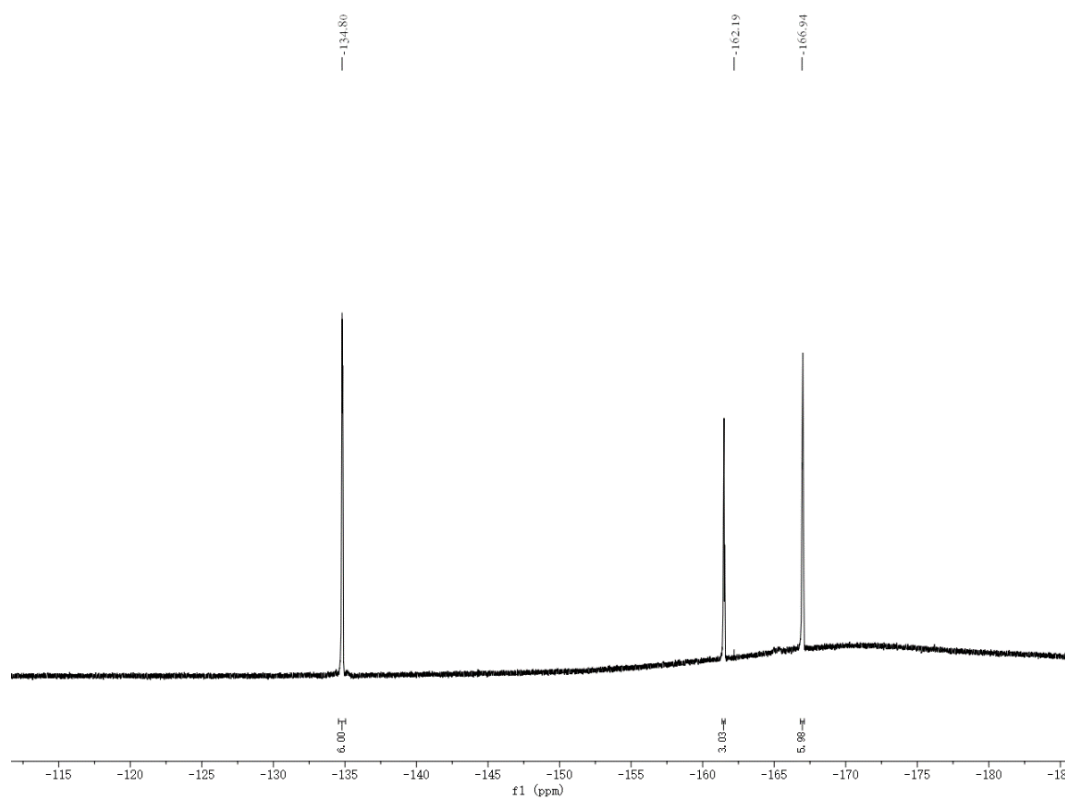

**Figure S19.**  $^{19}\text{F}$  NMR spectrum of **3** in  $\text{CD}_2\text{Cl}_2$



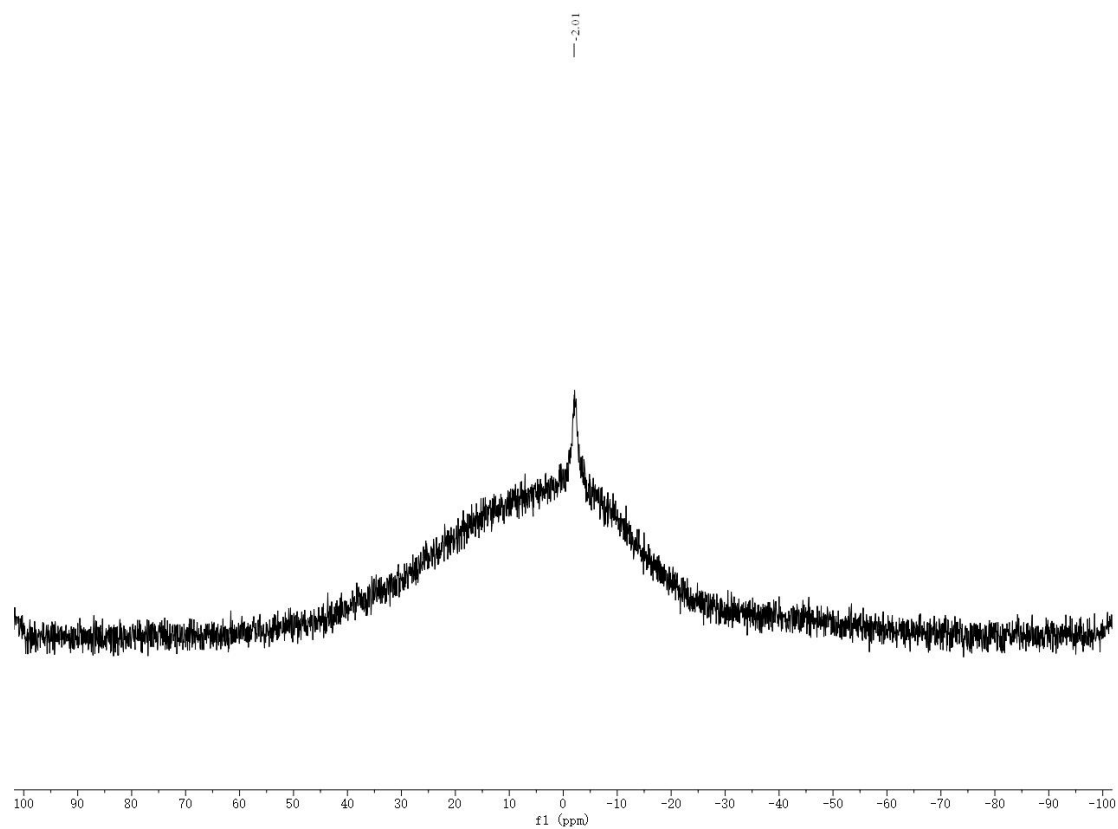

**Figure S20.**  $^{11}\text{B}$  NMR spectrum of **3** in  $\text{CD}_2\text{Cl}_2$

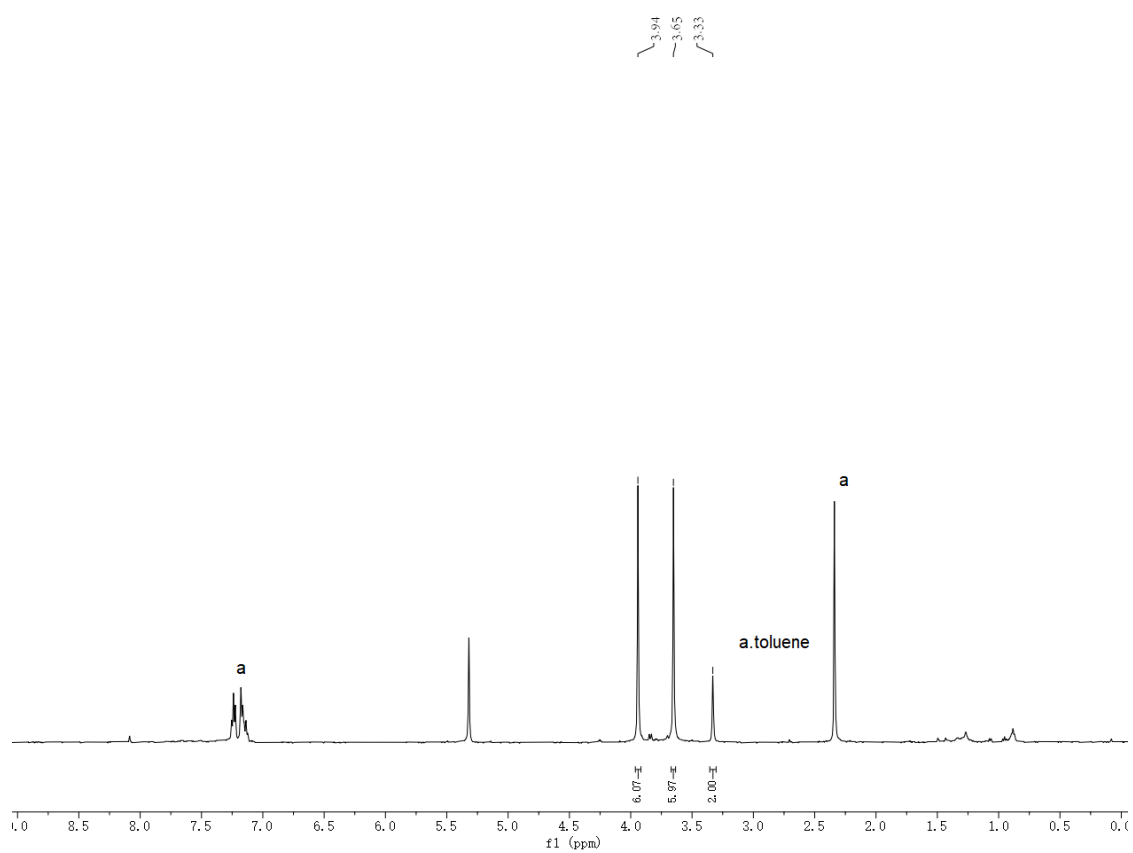

**Figure S21.**  $^1\text{H}$  NMR spectrum of **4** in  $\text{CD}_2\text{Cl}_2$

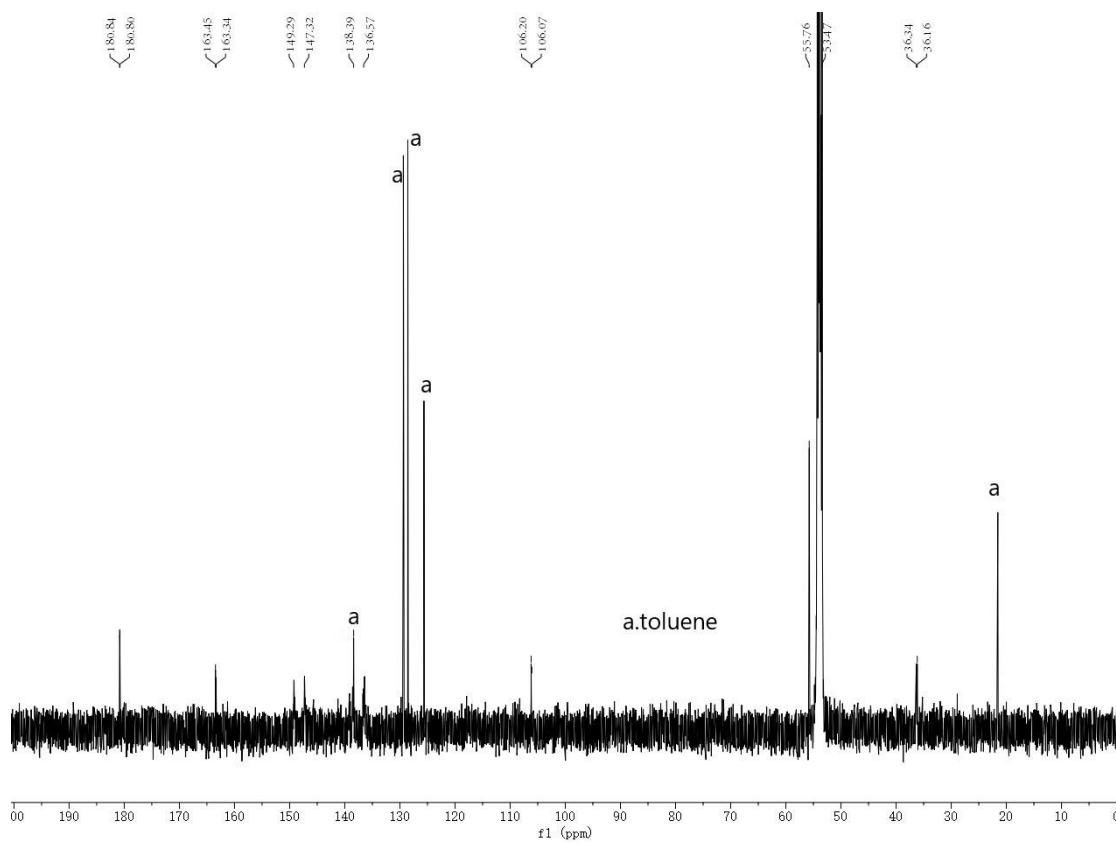

**Figure S22.**  $^{13}\text{C}$  NMR spectrum of **4** in  $\text{CD}_2\text{Cl}_2$

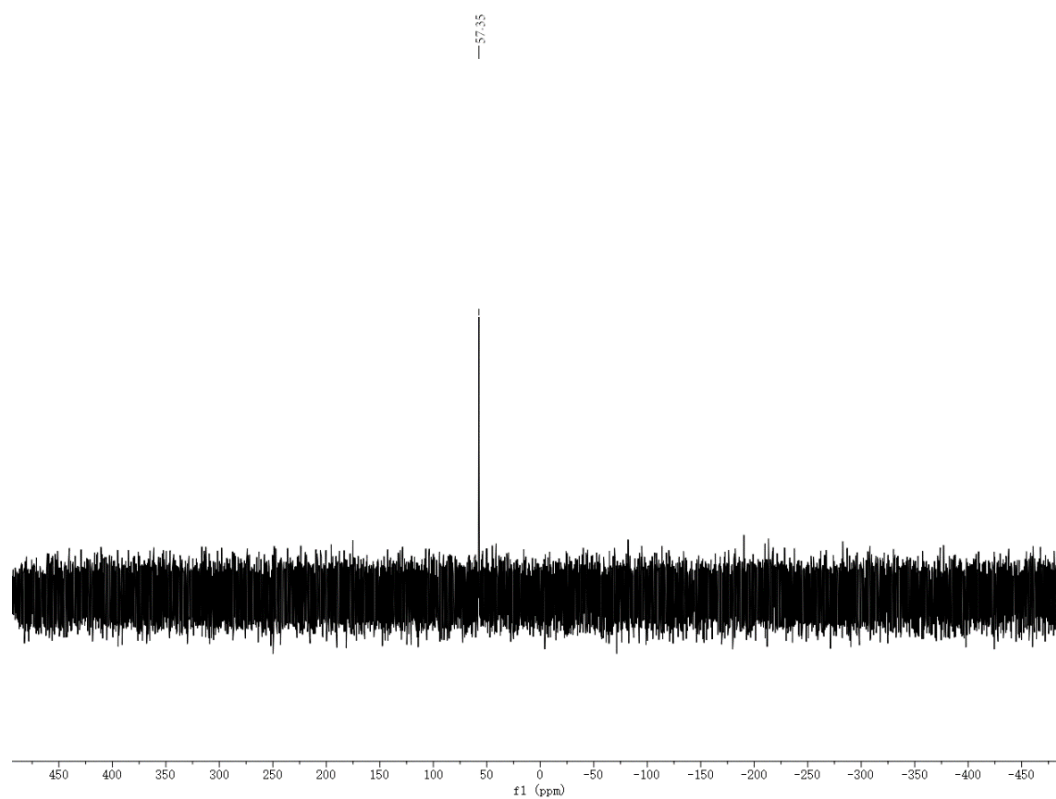

**Figure S23.**  $^{31}\text{P}$  NMR spectrum of **4** in  $\text{CD}_2\text{Cl}_2$

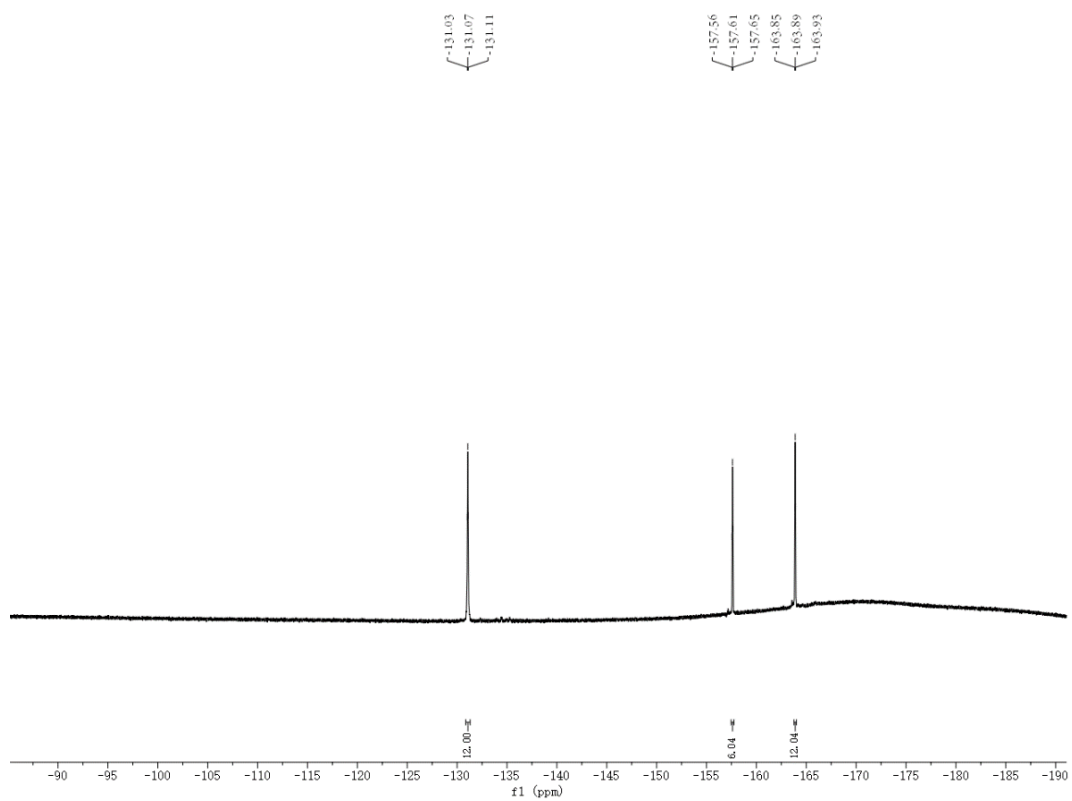

**Figure S24.**  $^{19}\text{F}$  NMR spectrum of **4** in  $\text{CD}_2\text{Cl}_2$

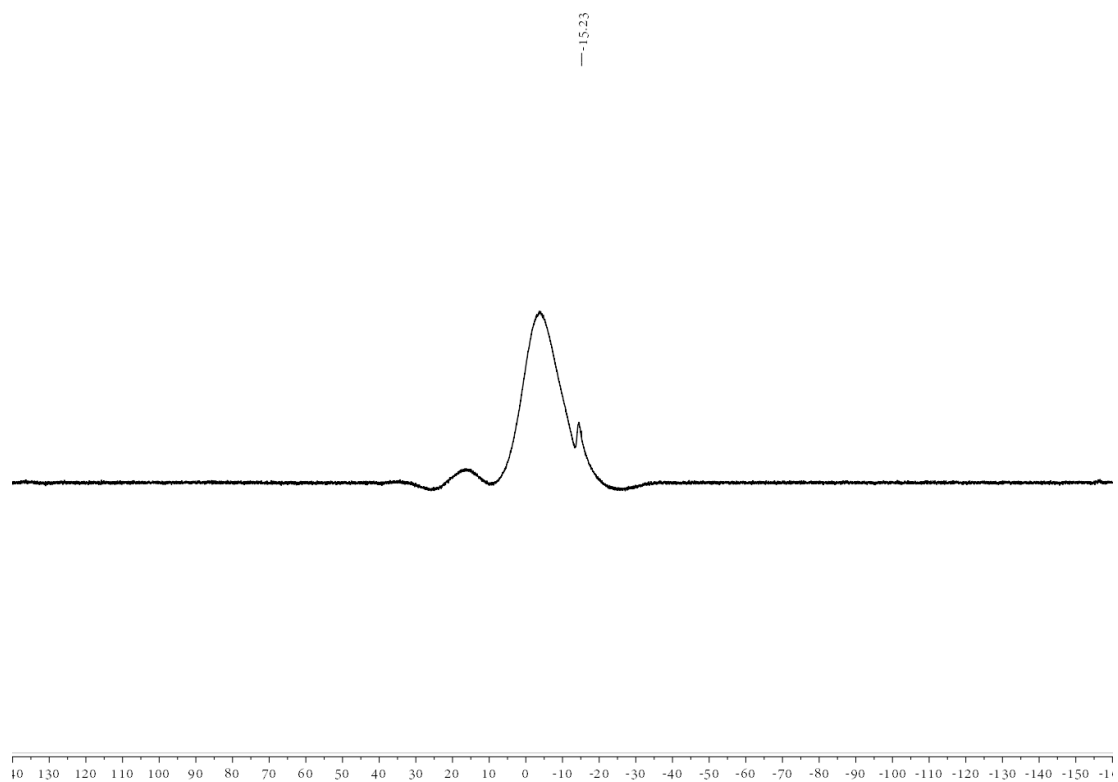

**Figure S25.**  $^{11}\text{B}$  NMR spectrum of **4** in  $\text{CD}_2\text{Cl}_2$

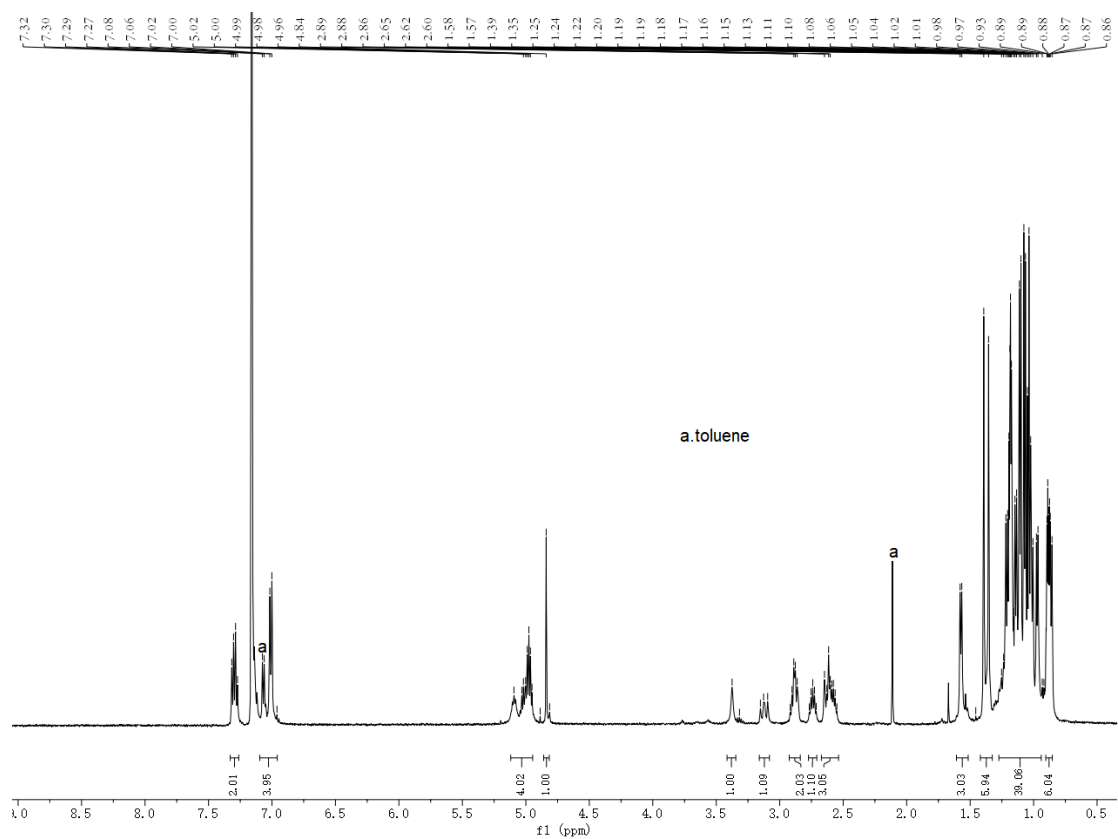

Figure S26.  $^1\text{H}$  NMR spectrum of **5** in  $\text{C}_6\text{D}_6$

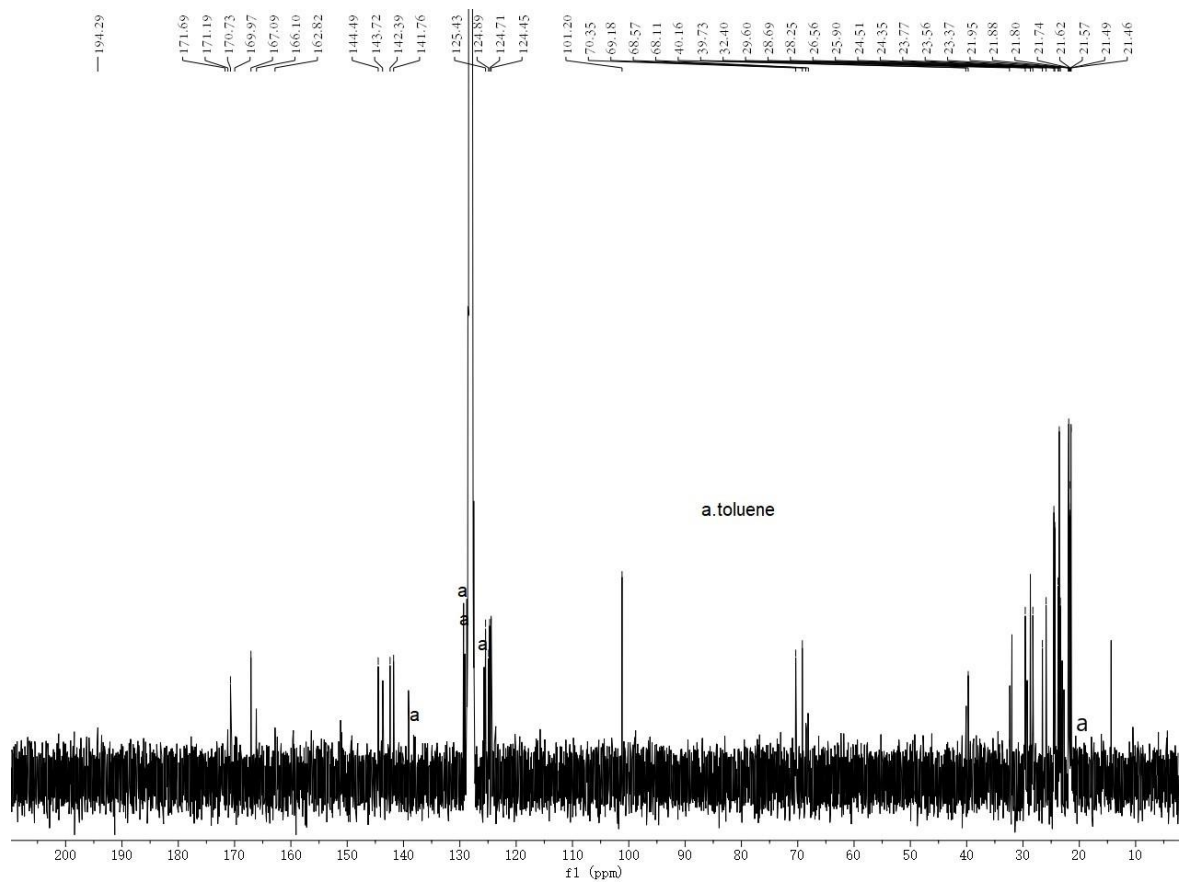

Figure S27.  $^{13}\text{C}$  NMR spectrum of **5** in  $\text{C}_6\text{D}_6$

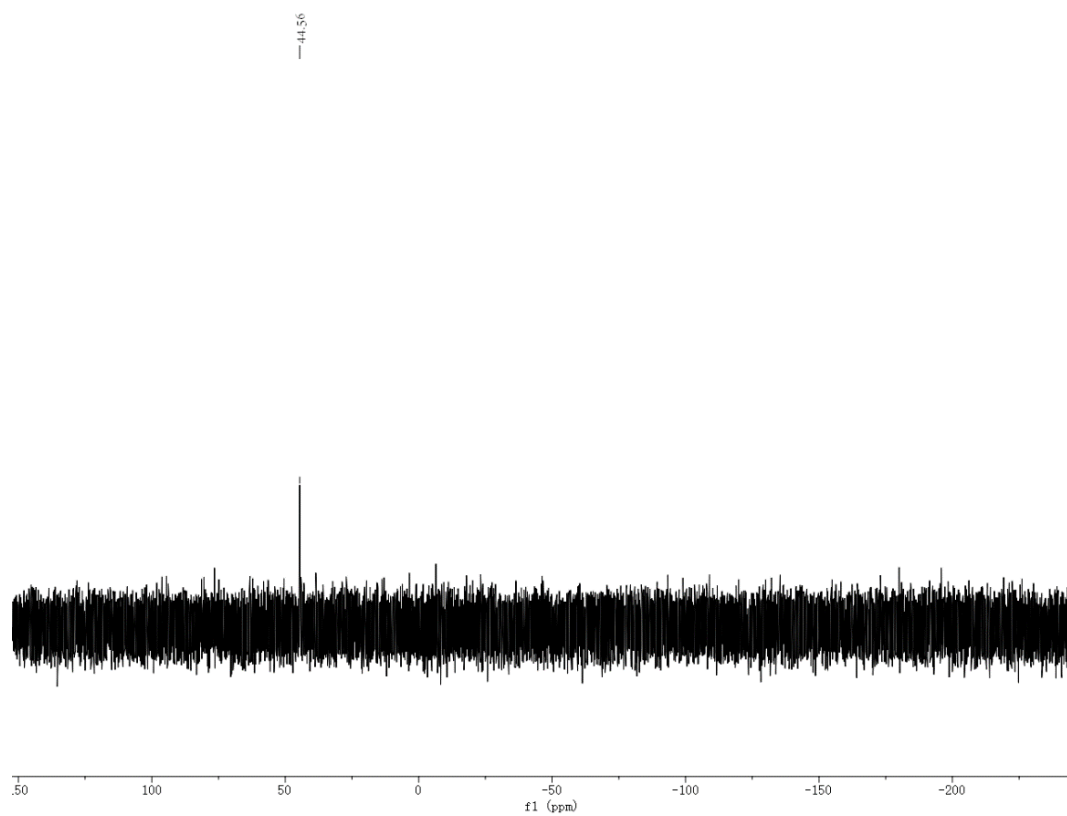

**Figure S28.**  $^{31}\text{P}$  NMR spectrum of **5** in  $\text{C}_6\text{D}_6$

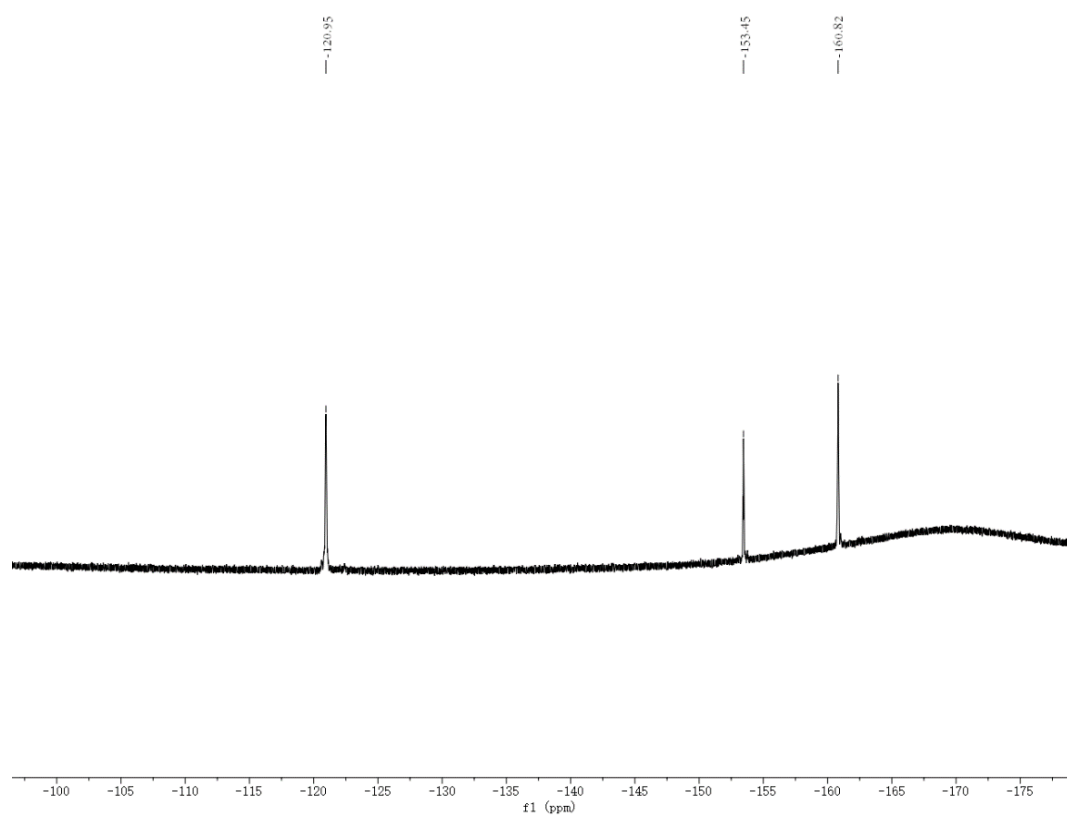

**Figure S29.**  $^{19}\text{F}$  NMR spectrum of **5** in  $\text{C}_6\text{D}_6$

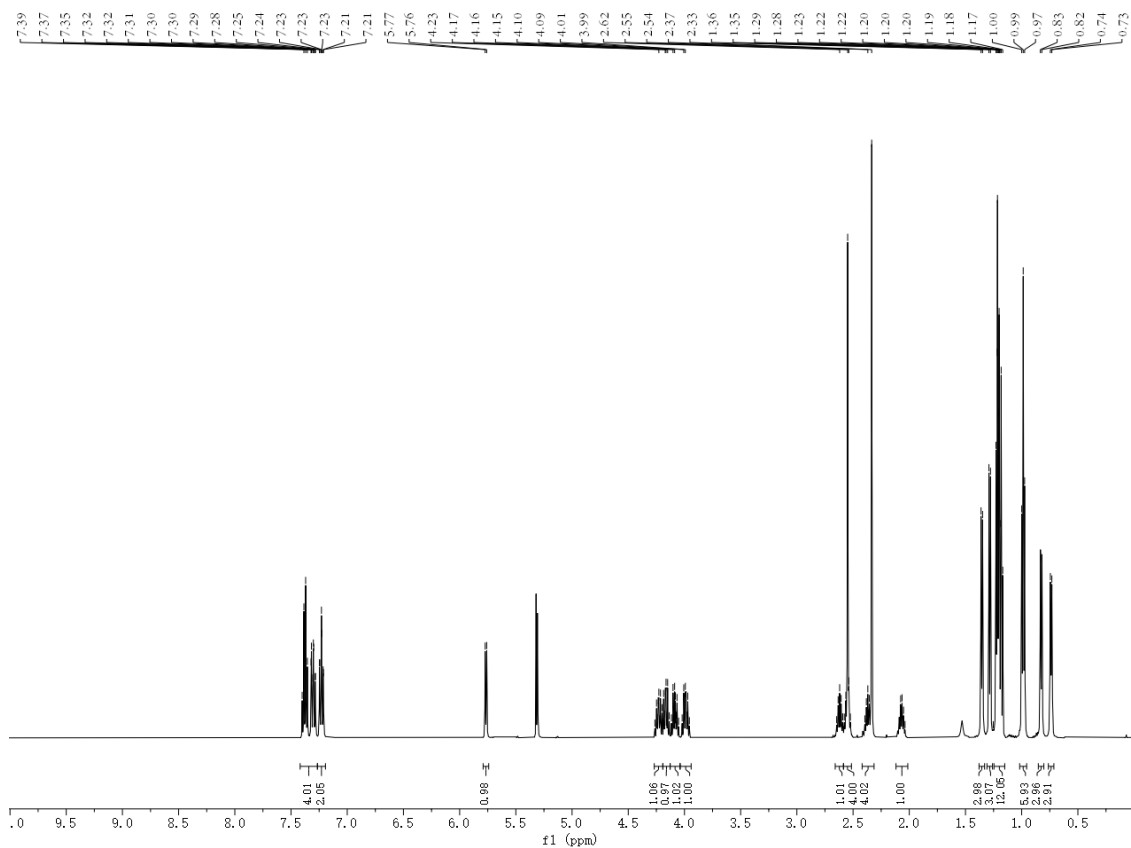

Figure S30.  $^1\text{H}$  NMR spectrum of **6** in  $\text{CD}_2\text{Cl}_2$

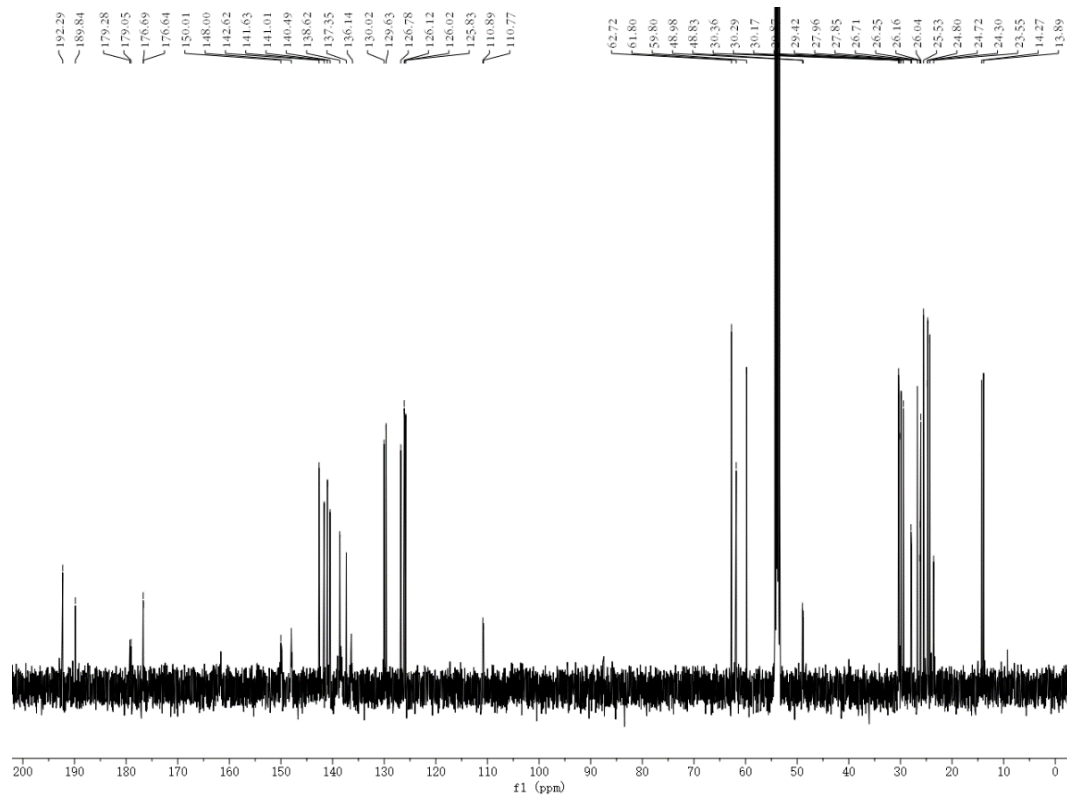

Figure S31.  $^{13}\text{C}$  NMR spectrum of **6** in  $\text{CD}_2\text{Cl}_2$

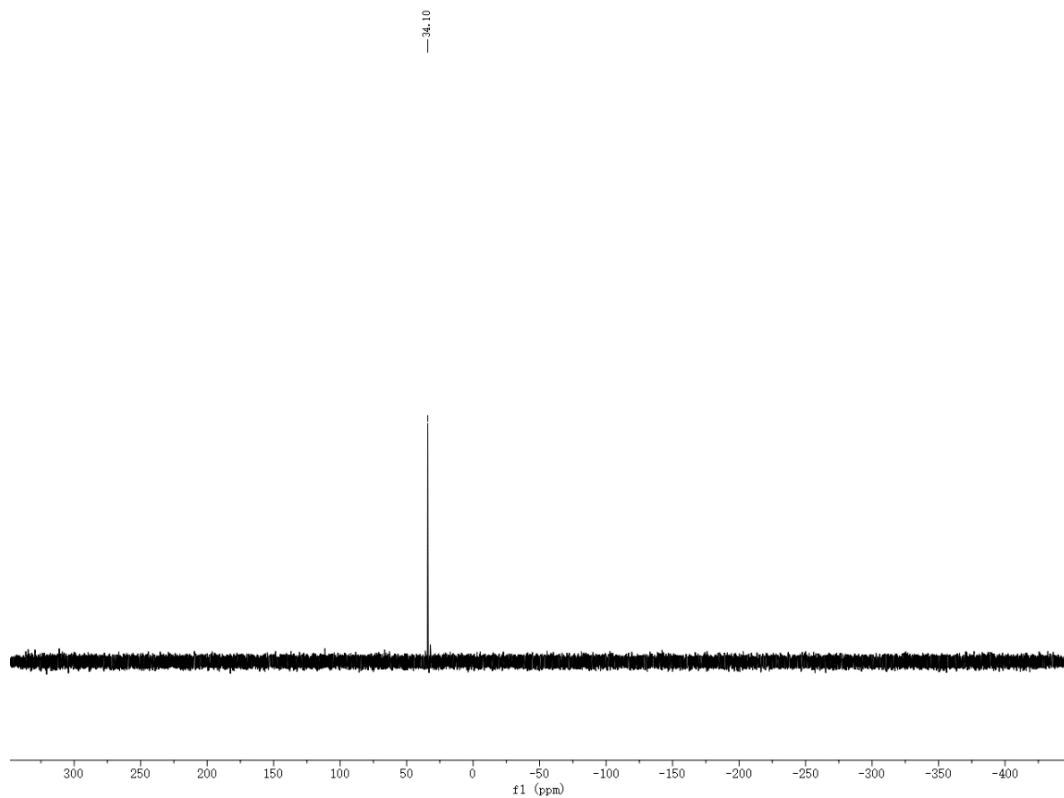

**Figure S32.**  $^{31}\text{P}$  NMR spectrum of **6** in  $\text{CD}_2\text{Cl}_2$

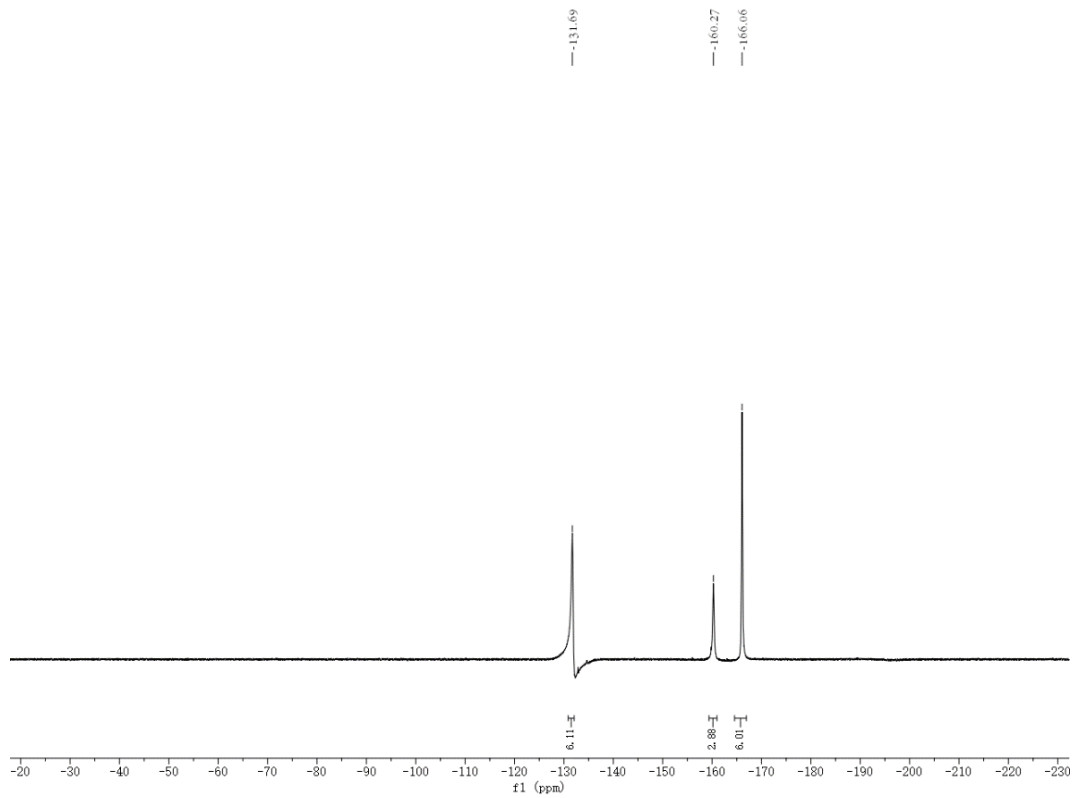

**Figure S33.**  $^{19}\text{F}$  NMR spectrum of **6** in  $\text{CD}_2\text{Cl}_2$

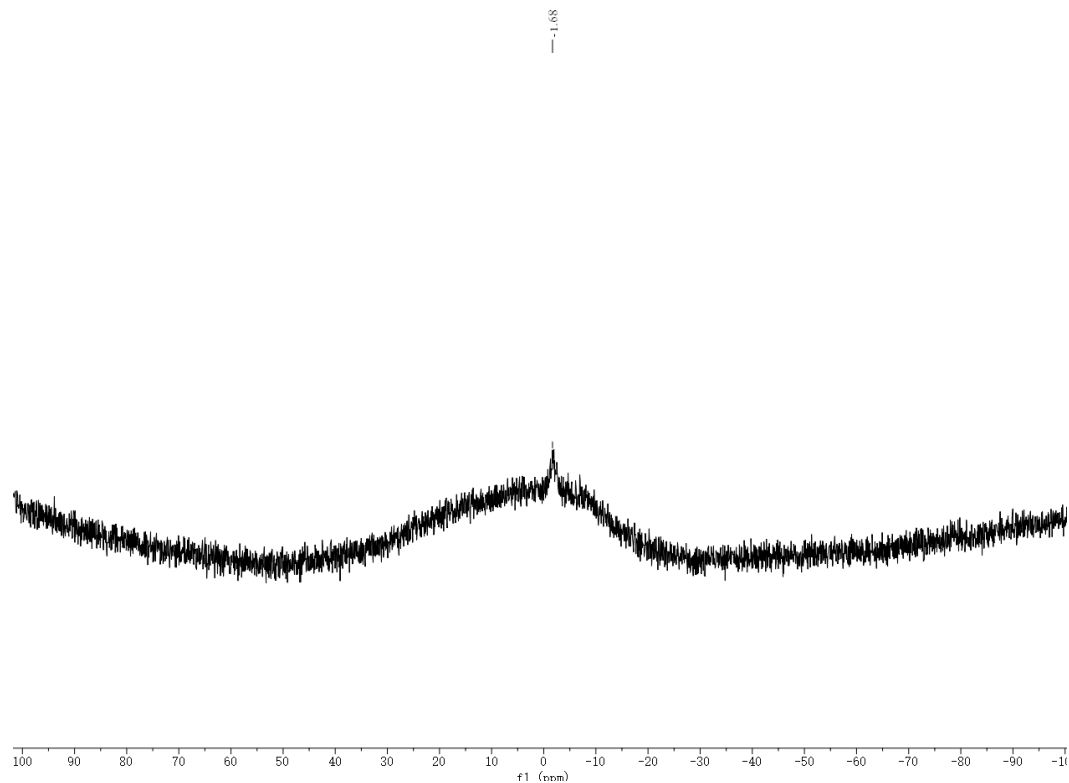

Figure S34.  $^{11}\text{B}$  NMR spectrum of **6** in  $\text{CD}_2\text{Cl}_2$

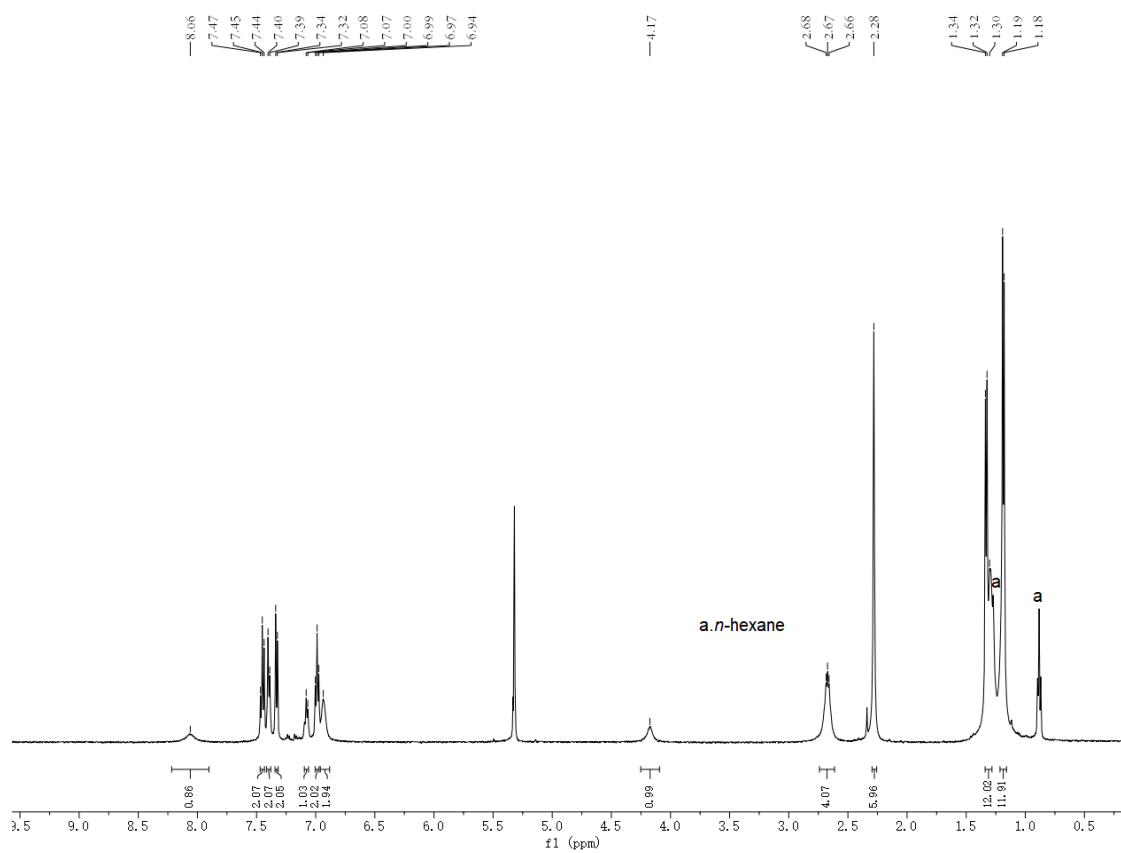

Figure S35.  $^1\text{H}$  NMR spectrum of **7** in  $\text{CD}_2\text{Cl}_2$



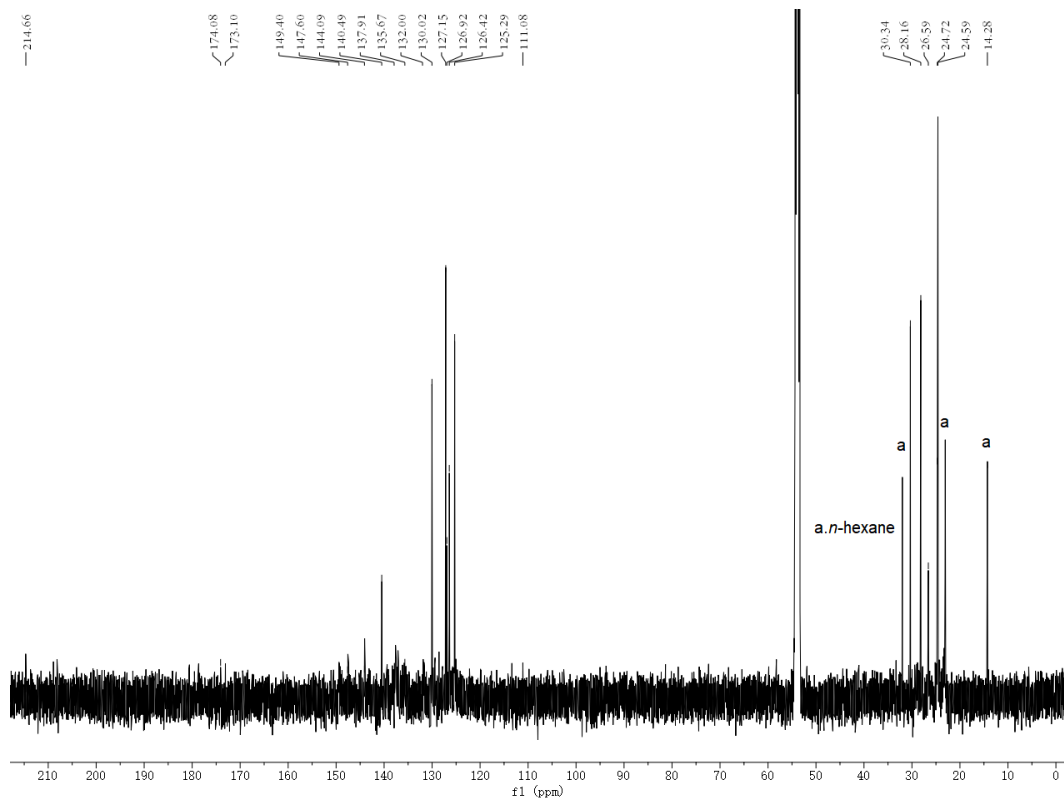

Figure S36.  $^{13}\text{C}$  NMR spectrum of **7** in  $\text{CD}_2\text{Cl}_2$

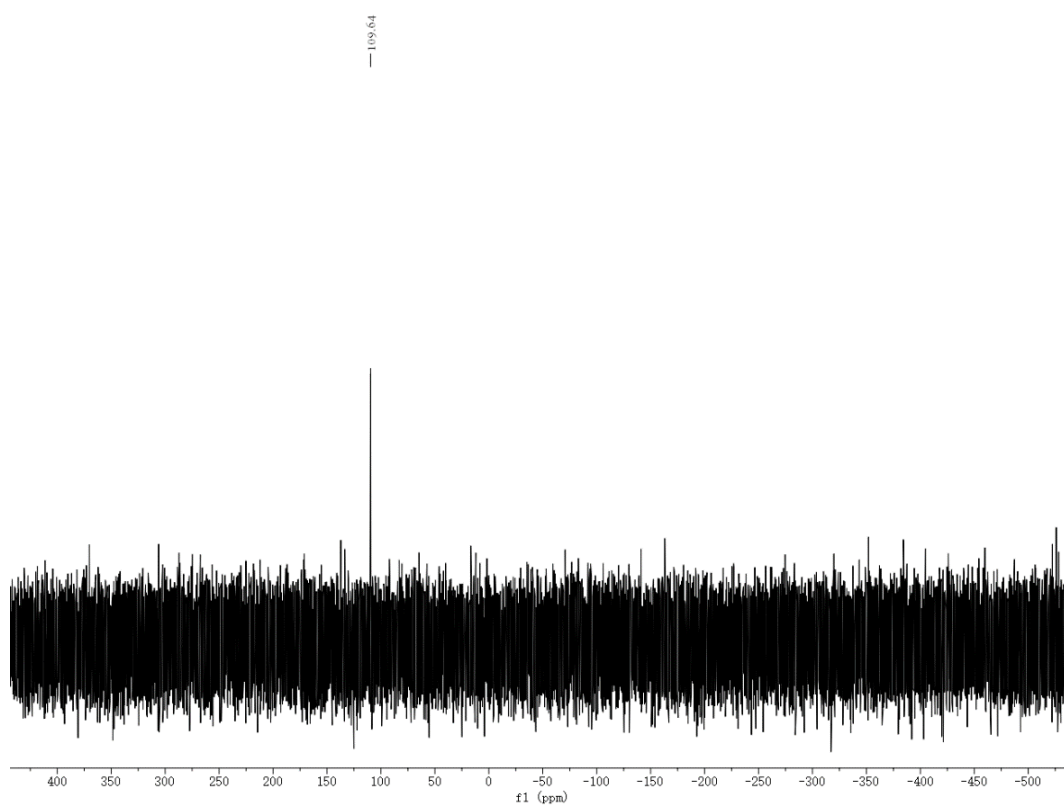

Figure S37.  $^{31}\text{P}$  NMR spectrum of **7** in  $\text{CD}_2\text{Cl}_2$

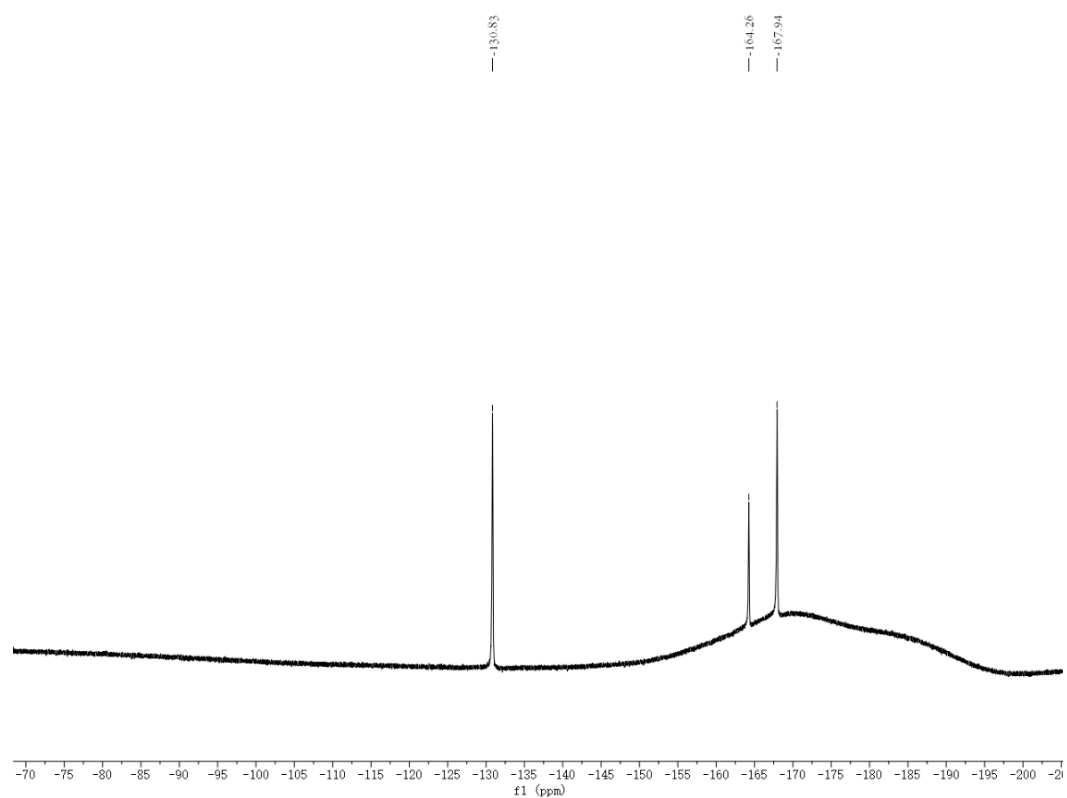

**Figure S38.**  $^{19}\text{F}$  NMR spectrum of **7** in  $\text{CD}_2\text{Cl}_2$

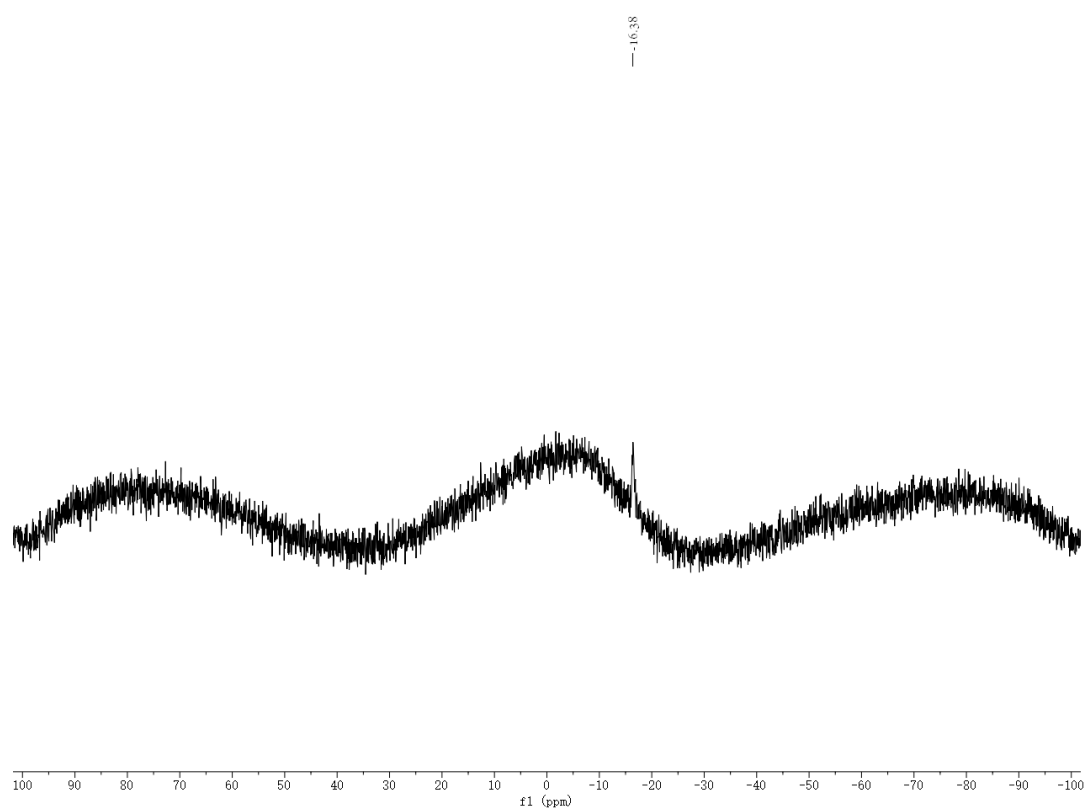

**Figure S39.**  $^{11}\text{B}$  NMR spectrum of **7** in  $\text{CD}_2\text{Cl}_2$

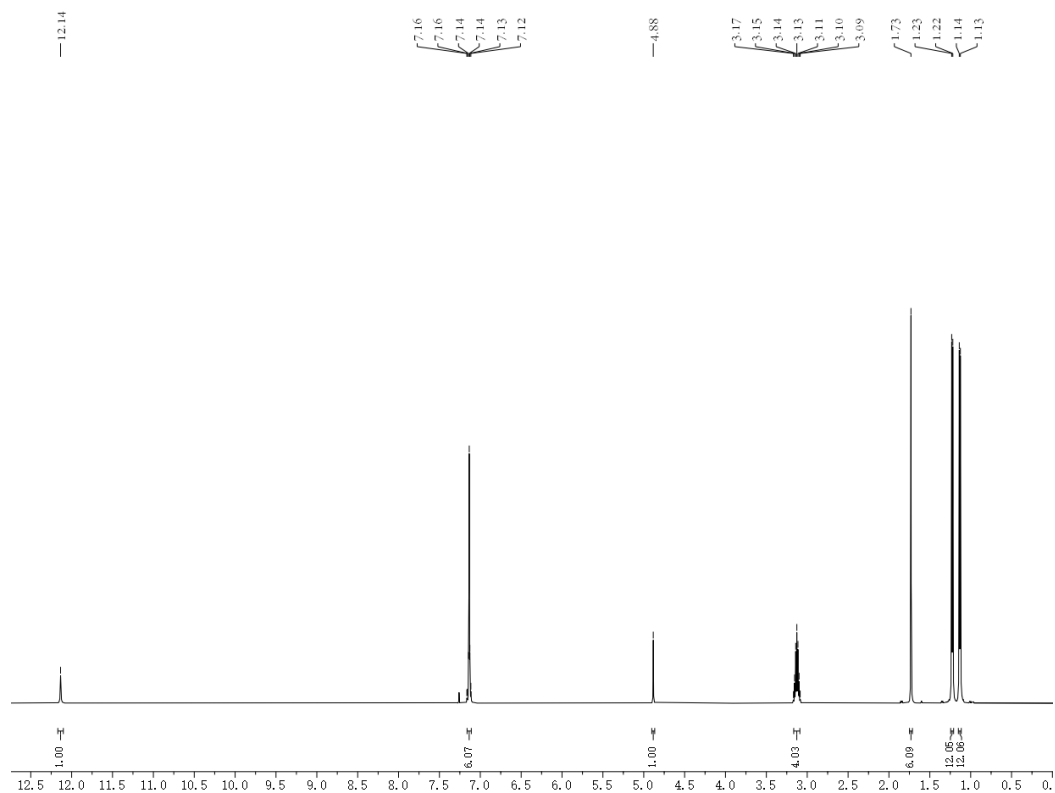

**Figure S40.**  $^1\text{H}$  NMR spectrum ( $\text{CDCl}_3$ ) of the NacnachH isolated from the reaction of **1** and dimethyl maleate at room temperature

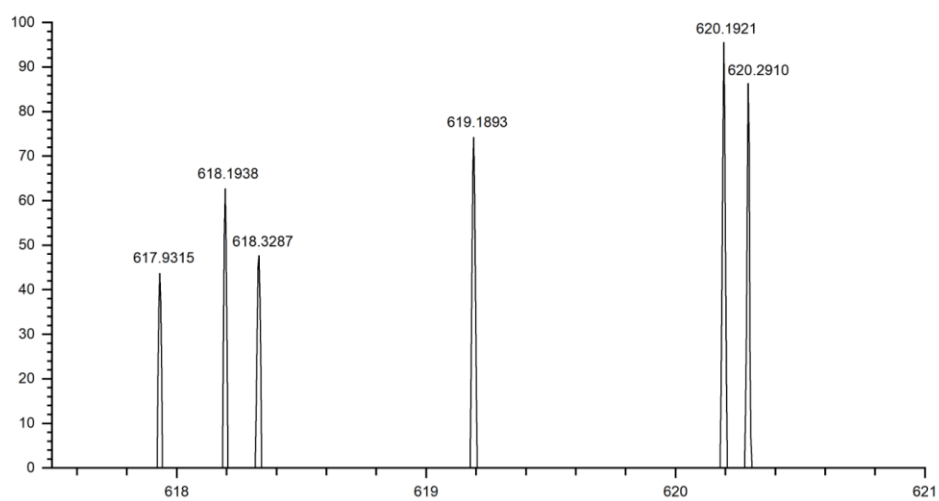

**Figure S41.** HRMS spectrum of **1**

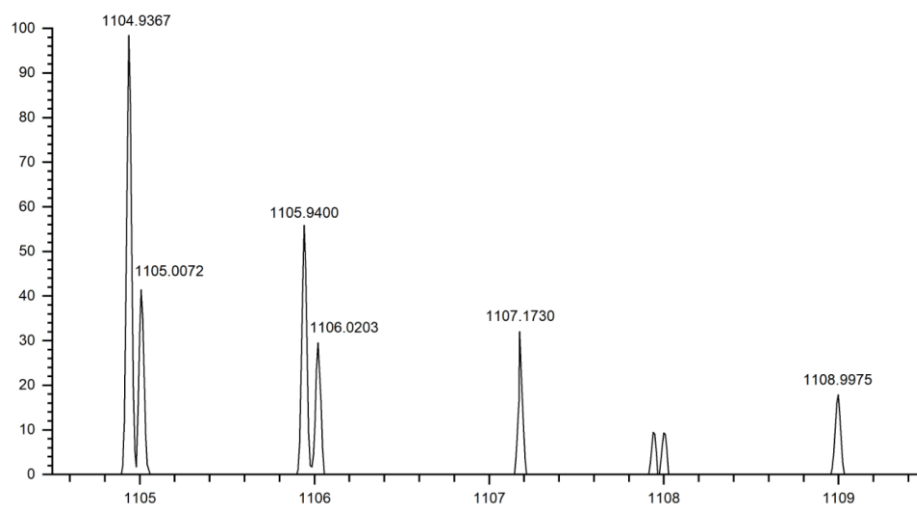

**Figure S42.** HRMS spectrum of **2**

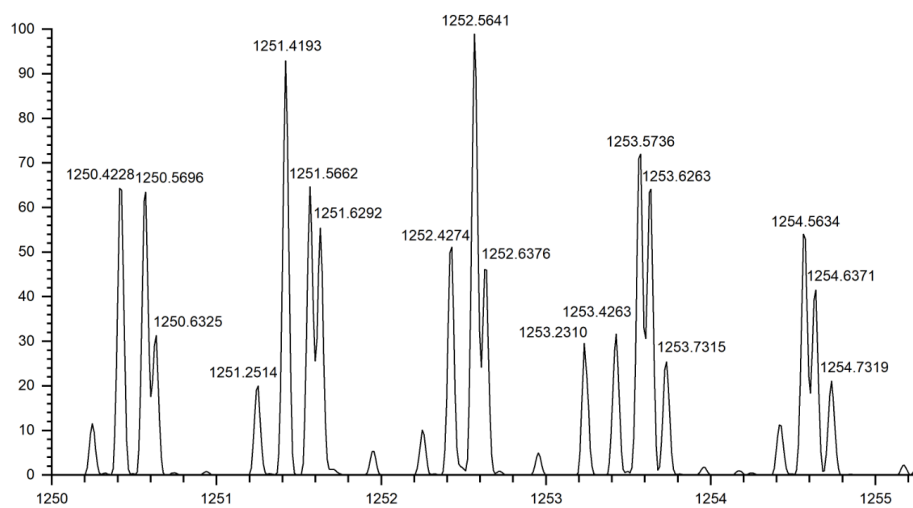

**Figure S43.** HRMS spectrum of **3**

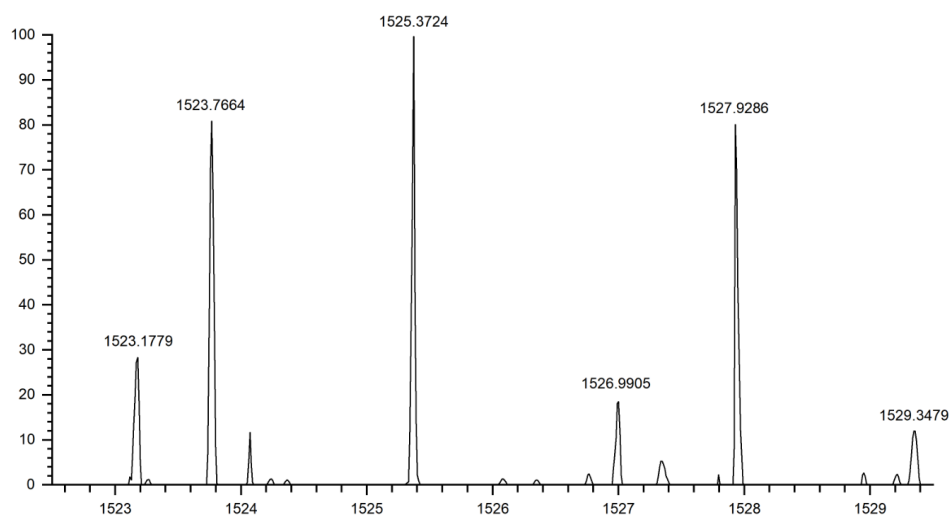

**Figure S44.** HRMS spectrum of **5**

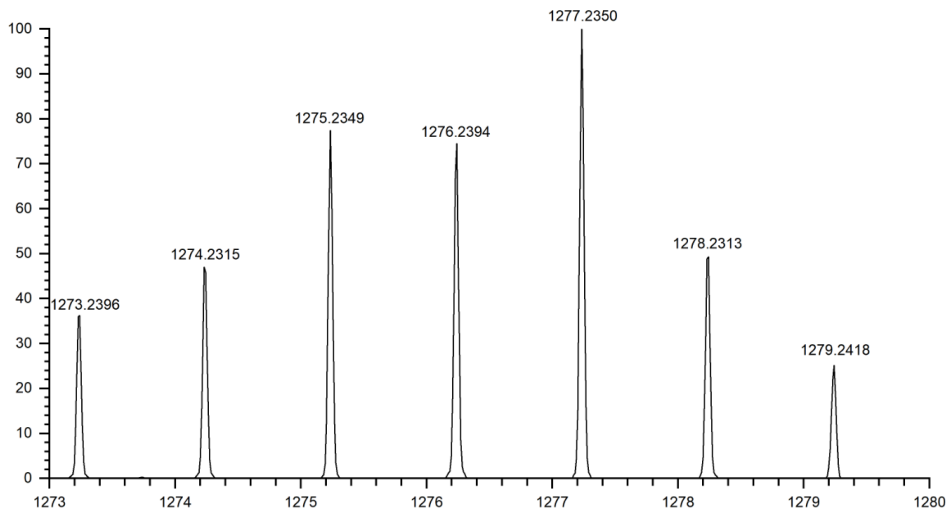

**Figure S45.** HRMS spectrum of **6**

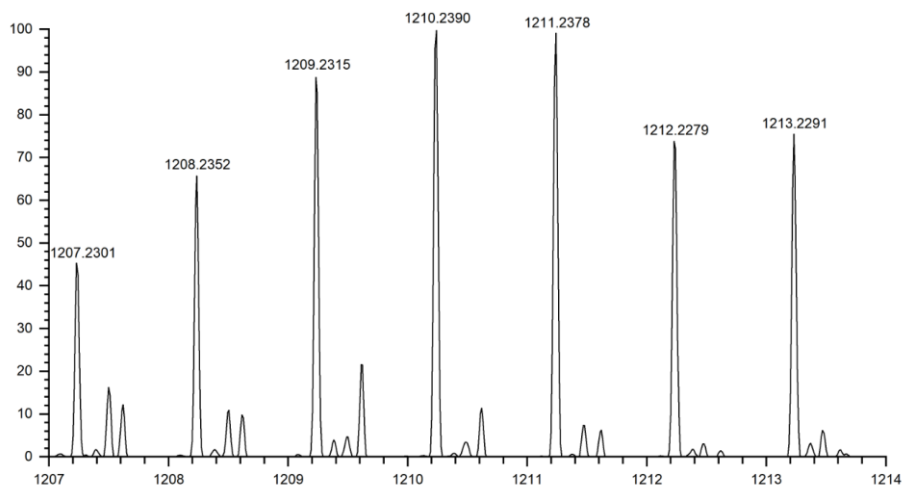

**Figure S46.** HRMS spectrum of **7**

## Reference

- [S1] Y. Ding, H. W. Roesky, M. Noltemeyer, H.-G. Schmidt, P. P. Power, *Organometallics* **2001**, *20*, 1190-1194.
- [S2] D. Heift, Z. Benkő, H. Grützmacher, *Dalton Trans.* **2014**, *43*, 831-840.
- [S3] O. V. Dolomanov, L. J. Bourhis, R. J. Gildea, J. A. K. Howard, H. Puschmann, *J. Appl. Crystallogr.* **2009**, *42*, 339-341.
- [S4] G. Sheldrick, *Acta Crystallogr. Sect. A* **2015**, *71*, 3-8.
- [S5] G. Sheldrick, *Acta Crystallogr. Sect. A* **2008**, *64*, 112-122.
